1           **Revealing neural correlates of behavior without**  
2                                           **behavioral measurements**

3           Alon Rubin<sup>1\*</sup>, Liron Sheintuch<sup>1</sup>, Noa Brande-Eilat<sup>1</sup>, Or Pinchasof<sup>1</sup>, Yoav  
4                                           Rechavi<sup>1</sup>, Nitzan Geva<sup>1</sup>, and Yaniv Ziv<sup>1\*</sup>

5           **Affiliation:** 1: Department of Neurobiology, Weizmann Institute of Science, Rehovot  
6                                           76100, Israel.

7           \*Correspondence to: [yaniv.ziv@weizmann.ac.il](mailto:yaniv.ziv@weizmann.ac.il) or [alon.rubin@weizmann.ac.il](mailto:alon.rubin@weizmann.ac.il)

1 **Measuring neuronal tuning curves has been instrumental for many discoveries in**  
2 **neuroscience but requires a-priori assumptions regarding the identity of the**  
3 **encoded variables. We applied unsupervised learning to large-scale neuronal**  
4 **recordings in behaving mice from circuits involved in spatial cognition, and**  
5 **uncovered a highly-organized internal structure of ensemble activity patterns. This**  
6 **emergent structure allowed defining for each neuron an ‘internal tuning-curve’ that**  
7 **characterizes its activity relative to the network activity, rather than relative to any**  
8 **pre-defined external variable – revealing place-tuning in the hippocampus and**  
9 **head-direction tuning in the thalamus and postsubiculum, without relying on**  
10 **measurements of place or head-direction. Similar investigation in prefrontal cortex**  
11 **revealed schematic representations of distances and actions, and exposed a**  
12 **previously unknown variable, the ‘trajectory-phase’. The structure of ensemble**  
13 **activity patterns was conserved across mice, allowing using one animal’s data to**  
14 **decode another animal’s behavior. Thus, the internal structure of neuronal activity**  
15 **itself enables reconstructing internal representations and discovering new**  
16 **behavioral variables hidden within a neural code.**

17

18 Most neurons in the brain do not receive direct inputs from the external world; rather,  
19 their activity is governed by their interactions with other neurons within and across brain  
20 circuits. Despite this fact, studies in neuroscience typically focus on neuronal  
21 responsiveness to an examined external variable (i.e., a *neuronal tuning curve*). Rooted  
22 in the emergence in the 1950’s of electrophysiological techniques for recording from  
23 single neurons in vivo, this ‘neural correlate’ approach opened the door to studying how  
24 specific brain circuits form internal representations, and has led to seminal  
25 breakthroughs. Examples of such breakthroughs include the discoveries of orientation  
26 tuning in the visual cortex<sup>1</sup>, hippocampal place cells<sup>2</sup>, and entorhinal grid cells<sup>3,4</sup>.  
27 However, while such analyses remain invaluable for many neuroscientific studies, they  
28 are limited to a-priori defined external variables, overlooking other variables that were not  
29 measured, considered relevant, or observable<sup>5-7</sup>. With traditional electrophysiological  
30 techniques that permitted recordings from only small numbers of neurons, no feasible  
31 alternatives to this approach existed. Recent advances in multi-electrode and optical  
32 imaging technologies enable simultaneous readout of activity from large neuronal  
33 populations, permitting a qualitatively different approach to study the neural code—via  
34 the attributes of neuronal activity itself.

35 We hypothesized that the relationships between neuronal population activity patterns  
36 would give rise to a structure within the neuronal activity space that differs across brain  
37 circuits according to their distinct computational roles. Thus, studying the internal  
38 structure of neuronal activity itself could reveal key properties of the neural code that are  
39 specific to a given brain circuit, without relying on measurements of the behavior or the  
40 stimulus. We further hypothesized that characterizing the activity of single neurons with  
41 respect to this structure (rather than relative to any pre-selected external variable), could

1 yield *internal tuning curves*, which capture the properties of classically-computed tuning  
2 curves. Realization of such an approach could enable the investigation of neural coding  
3 in brain circuits for which little is known about the identity of the variables they encode,  
4 and circumvent biases associated with the naïve application of the neural correlate  
5 approach.

6

## 7 **Results**

### 8 **Internal representation of space in the hippocampus**

9 First, we sought to study a brain circuit that is known to encode a canonical variable, and  
10 test whether its coding properties could be extracted from the internal structure of  
11 neuronal activity. Thus, we focused on the dorsal CA1 of the hippocampus, a circuit in  
12 which many neurons are tuned to spatial position<sup>2</sup>. We used miniaturized head-mounted  
13 microscopes<sup>8</sup> to image Ca<sup>2+</sup> dynamics in GCaMP6 expressing hippocampal CA1  
14 neurons in freely behaving mice. During imaging, mice ran back and forth along a linear  
15 track to collect water rewards<sup>9</sup> (**Fig. 1a**). After detecting cells and Ca<sup>2+</sup> events in the  
16 imaging data<sup>9,10</sup>, we constructed neuronal ensemble activity vectors of instantaneous  
17 neuronal activity sampled at fixed time bins. To explore the relationships between the  
18 ensemble activity patterns we applied a non-linear dimensionality reduction algorithm  
19 (Laplacian Eigenmaps<sup>11</sup>; LEM; **Supplementary Fig. 1**) to the activity vectors (**Fig. 1b**  
20 and **Supplementary Movie 1**). This analysis revealed a structure in the reduced  
21 dimensional neuronal activity space, with a high density of data points within a small  
22 number of clusters (clusters A, B, C, D, and E in **Fig. 1b**), suggesting that throughout the  
23 imaging session, the network leaped between discrete states. Temporally segmenting  
24 the data points into time intervals during which the network remained within a given state,  
25 revealed a recurring cyclic pattern of transitions between network states (**Fig. 1c**). Within  
26 a cycle, each state appeared only once, except for state C, which appeared twice, in two  
27 different phases. Further analysis revealed that the set of segments of state C consisted  
28 of two separate state subtypes (C<sub>1</sub> and C<sub>2</sub>; **Fig. 1d**), each corresponding to one of the  
29 two different phases (red and blue segments in **Fig. 1c**). These analyses allowed us to  
30 portray the intricate structure of network states and their pattern of transitions (**Fig. 1e-f**).

31 By sorting the behavioral data according to the specific network states, we found that  
32 each state corresponded to a different behavior and location along the linear track  
33 (**Supplementary Movie 2**). Specifically, states A and E, which were symmetrically  
34 located within the internal structure (**Fig. 1b**), corresponded to drinking at the left and  
35 right sides of the track, respectively. Similarly, the symmetric states B and D  
36 corresponded to turning at the two sides of the track. States C<sub>1</sub> and C<sub>2</sub> corresponded to

1 epochs of running in different directions along the linear track, consistent with the  
2 characteristics expected for spatial coding in one-dimensional environments<sup>12,13</sup>. Thus,  
3 the internal structure of neuronal activity exposed discrete sets of network states that  
4 corresponded to different combinations of locations and behaviors, without needing to a-  
5 priori hypothesize that these specific behavioral states are encoded by hippocampal  
6 neurons.

7 We next attempted to use the structure of the neuronal activity to characterize the  
8 internal representation of space at a finer resolution, and focused our analysis on states  
9 C<sub>1</sub> and C<sub>2</sub>. We applied the dimensionality reduction procedure separately for the data  
10 within C<sub>1</sub> and C<sub>2</sub>. Then, we estimated the internal dimension of the data<sup>14</sup>  
11 (**Supplementary Fig. 2**) of each state subtype and found that both C<sub>1</sub> and C<sub>2</sub> were one-  
12 dimensional (**Fig. 1g**). By sub-clustering the data points within C<sub>1</sub> and C<sub>2</sub>, we found an  
13 ordered pattern of transitions between the sub-clusters throughout each segment (**Fig.**  
14 **1h**), which monotonically covered a one-dimensional continuum of network states.  
15 Consistent with these observations, the trajectory of the network within the internal  
16 structure of neuronal activity reflected the trajectory of the mouse along the track,  
17 permitting accurate reconstruction of position (**Fig. 1i**; permutation test,  $p < 0.001$  for each  
18 mouse,  $N=4$ ). Note that because the reconstructed trajectory is not calibrated to the  
19 internal symmetry of the encoded variable nor to its identity, we set the reflection degree  
20 of freedom of the internal representation to match the position of the mouse. We then  
21 calculated the internal tuning curves of individual neurons: i.e., the activity of single  
22 neurons with respect to the different network states. The internal tuning curves had  
23 similar properties to those of their corresponding external tuning curves (i.e., place fields)  
24 (**Fig. 1j-k** and **Supplementary Fig. 3a**; permutation test,  $p < 0.001$  for each mouse,  $N=4$ ).  
25 These results demonstrate that the relationships among neuronal activity patterns  
26 themselves are sufficient to reconstruct the hippocampal representation of space.

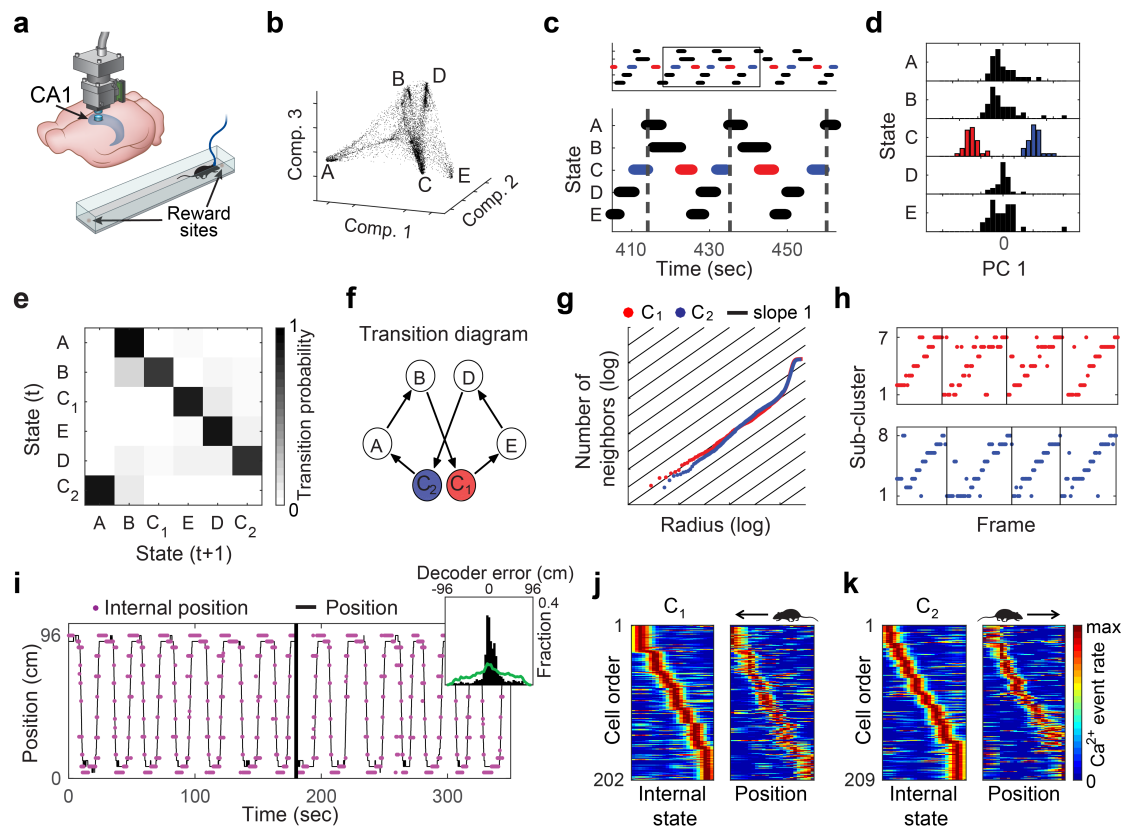

1 **Fig. 1: Hippocampal internal representation of position obtained without relying on**  
2 **behavioral data.** (a)  $\text{Ca}^{2+}$  imaging using miniaturized head-mounted microscopes in the  
3 hippocampal CA1 of freely behaving mice. Mice ran back and forth to collect rewards at the two  
4 ends of a linear track. (b) The distribution of data points in the reduced dimensional space of  
5 neuronal activity forms a small number of dense clusters. (c) The temporal structure of segmented  
6 data reveals a cyclic pattern of transitions between network states. Each state type appeared once  
7 per cycle except for state C which appeared in two different phases. (d) Principal component  
8 analysis applied separately to the segment-level activity patterns of each state indicated that only  
9 state C consists of two completely separate clusters (red and blue, subtypes  $C_1$  and  $C_2$ ,  
10 respectively). Histogram of the projections on the first principle component is presented for each  
11 state. Note that the two subtypes consistently appear in two different phases in the cyclic temporal  
12 pattern, as shown in c. (e) The segment-level transition matrix (i.e., the probability of a segment  
13 to be in cluster  $i$ , given that the preceding segment is in cluster  $j$ ) shows a stereotypical pattern of  
14 transitions between the different network states. (f) Illustration of the structure of network states  
15 and the stereotypical pattern of transitions between them. (g) Estimation of internal dimension  
16 calculated separately for data taken from segment subtypes  $C_1$  (red) and  $C_2$  (blue): Cumulative  
17 number of neighboring data points as a function of the radius in the reduced dimensionality space,  
18 plotted on a log-log scale. The slope of the data is close to one (black lines), indicating a  
19 dimension of one. (h) Sub-clusters within segments of subtype  $C_1$  (top) and  $C_2$  (bottom) exhibited  
20 a stereotypical temporal structure. Different trajectories within segments of subtype  $C_1$  and  $C_2$  are  
21 separated by black vertical lines indicate (i) The reconstructed internal position (magenta) and the  
22 actual position (black) of the mouse while freely exploring the linear track. Inset, distribution of the  
23 error in the reconstruction of position (black) versus shuffled data (green). (j-k) For each neuron,  
24 we calculated its internal tuning curve, relative to the internal state of the network (left), and the  
25 external tuning curve, relative to the position of the animal, namely place fields (right). Neuronal  
26 activity within segment subtype  $C_1$  is presented next to the activity of the same cells during  
27 leftward running (j), and activity within segment subtype  $C_2$  is presented next to the activity of the  
28 same cells during rightward running (k).

29

30 **Internal representations in the medial prefrontal cortex**

1 Thus far, our analysis focused on data recorded from the hippocampus, a brain region in  
2 which the encoding of a known variable (place) is dominant. We next examined whether  
3 a similar analysis can reveal internal representations using recordings from brain circuits  
4 that have not been associated with a canonical encoded variable. To this end, we  
5 focused on the anterior cingulate cortex (ACC), a sub-region within the medial prefrontal  
6 cortex (mPFC) that is involved in multiple high-order cognitive processes<sup>15–18</sup>. We  
7 conducted Ca<sup>2+</sup> imaging in the ACC of freely behaving mice performing the same linear  
8 track exploration task described above for hippocampal imaging (**Fig. 2a**). Dimensionality  
9 reduction of the neuronal activity revealed a high density of data points within a small  
10 number of clusters (**Fig. 2b**), similar to our observations in the hippocampus. Next, we  
11 clustered the data points into different network states and calculated their transition  
12 matrix (**Fig. 2c**), which exhibited a recurring cyclic pattern (**Fig. 2c-d**). In contrast to our  
13 observations from the hippocampal data, in the ACC the representation of behaviors on  
14 both sides of the track converged onto the same network states (**Fig. 2d**). Consistent  
15 with this observation, the distribution of the animal's position along the linear track was  
16 symmetrical for each of the identified network states (**Fig. 2e**). Furthermore, by sorting  
17 the behavioral data according to the network states, we found that each state  
18 corresponded to a distinct behavior, irrespective of the position of the mouse. We termed  
19 these behaviors 'Rearing', 'Turning', 'Start run', 'End run', and 'Drinking' (**Supplementary**  
20 **Movie 3**). We confirmed this clustering-based classification using manual labeling of the  
21 mouse behavior (**Fig. 2f**).

22 To study the structure of the neuronal activity in the ACC at a finer resolution, we focused  
23 on the network states that were linked to running ('Start run' and 'End run'). We found  
24 that neuronal activity represented the position of the mouse relative to the start and end  
25 points of each track traversal, regardless of the running direction (i.e. the trajectory  
26 phase; **Fig. 2g**). Consistent with this observation, constructing internal tuning curves  
27 revealed individual neurons that were tuned to a specific phase, namely, trajectory-phase  
28 cells (**Fig. 2h** and **Supplementary Fig. 4a-b**). The internal tuning captured the external  
29 tuning of the same neurons to the trajectory phase (**Fig. 2h** and **Supplementary Fig. 3b**;  
30 permutation test,  $p < 0.001$  for each mouse,  $N=3$ ). The observed encoding of trajectory  
31 phase could not be accounted for by velocity or acceleration (**Supplementary Fig. 5**).  
32 Thus, even in a brain circuit in which less is known about the identity of the encoded  
33 variables, our analysis exposed key properties of the internal representation, and the  
34 encoding of a previously unknown variable.

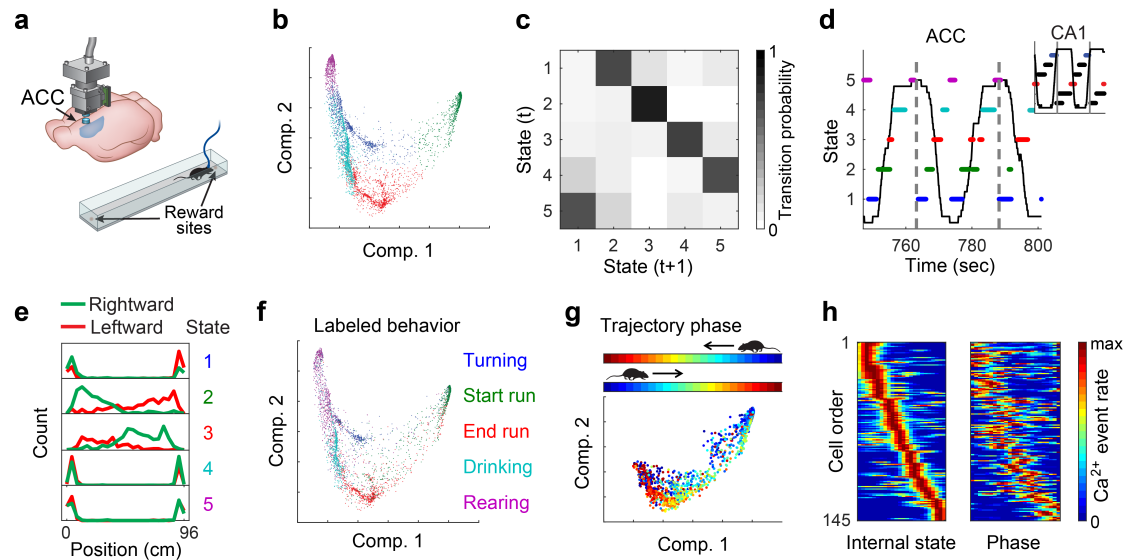

1 **Fig. 2: ACC activity reveals a schematic representation of behavior along the linear track.**  
 2 (a)  $\text{Ca}^{2+}$  imaging using miniaturized head-mounted microscopes in the ACC of freely behaving  
 3 mice. Mice ran back and forth to collect rewards at the two ends of a linear track. (b) The  
 4 distribution of data points in the reduced dimensional space of neuronal activity. The data are  
 5 clustered and colored to indicate each of the different clusters. (c) The segment-level transition  
 6 matrix shows a stereotypical pattern of transitions between the different network states. (d)  
 7 A stereotypic temporal structure of network states (marked by different colors) is observed during  
 8 exploration of the linear track (animal position is shown in black). A full running cycle (bounded  
 9 between vertical gray lines) corresponds to two cycles of transitions between network states. Inset,  
 10 hippocampal data, in which a full running cycle (bounded between vertical gray lines) corresponds  
 11 to a single cycle of transitions between network states. (e) The distribution of mouse position along  
 12 the linear track is symmetrical for each of the network states. (f) The same distribution presented  
 13 in a, with data points colored according to behavioral labeling. (g) Distribution of data points in the  
 14 reduced dimensional space of neuronal activity for the two clusters corresponding to running. Data  
 15 points are colored according to trajectory phase, i.e., the distance of the mouse from the start of  
 16 the track (opposite end for each running direction). (h) For each neuron, we calculated its internal  
 17 tuning curve, relative to the internal state of the network (left), and the external tuning curve,  
 18 relative to the trajectory phase of the animal (right).

19

## 20 **Different internal structures of neuronal activity in the ACC and the hippocampus** 21 **reflect different types of representations of locations and actions**

22 Having found different structures of neuronal activity in the ACC and hippocampus under  
 23 the same behavioral task, we sought to further characterize the differences between their  
 24 internal representations of locations and actions. Neuronal activity in the ACC, but not in  
 25 the hippocampus, was similar during epochs of the same behavioral state at opposite  
 26 sides of the track (**Fig. 3a**, and **Supplementary Fig. 6**; one sample t-test,  $p > 0.05$  and  
 27  $p < 0.05$  for each behavioral state for CA1 and ACC, respectively). This distinction  
 28 between the neuronal coding in the hippocampus and ACC was also evident when  
 29 examining the tuning of individual cells (**Fig. 3b** and **Supplementary Fig. 4**). To further  
 30 substantiate the differences between the encoding of trajectory phase and position, we  
 31 devised a “phase decoder”, and found that in the ACC we could accurately infer the  
 32 trajectory phase in a given direction, when the decoder was trained on the relationship

1 between neuronal activity and the trajectory phase in the opposite direction (**Fig. 3c**;  
 2 permutation test,  $p < 0.001$  for each mouse,  $N=3$ ). Notably, we could not predict the  
 3 trajectory phase when applying the same analysis to hippocampal data (**Fig. 3c**;  
 4 permutation test,  $p > 0.05$  for each mouse,  $N=4$ ). Consistent with these findings,  
 5 population activity in the ACC was correlated between symmetrical spatial locations for  
 6 opposite running directions along the linear track (**Fig. 3d-e**). In contrast, in the  
 7 hippocampus, neuronal representations differed considerably between the two sides of  
 8 the track, and were more sharply tuned to position than in the ACC (**Fig. 3f**). Overall, we  
 9 found that ACC neurons are spatially tuned, but the nature of their spatial representation  
 10 is markedly different from the classical spatial tuning properties of hippocampal neurons.

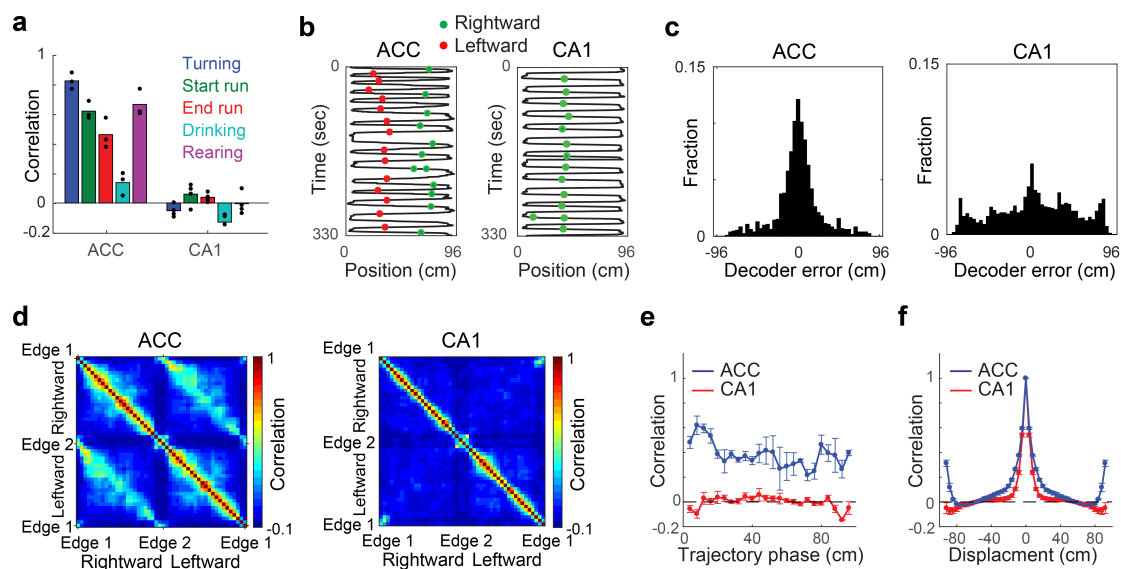

11

12 **Fig. 3: The different internal structures in the ACC and the hippocampus reflect different**  
 13 **representations of locations and actions.** (a) Pearson correlation between ensemble activity  
 14 patterns from the two sides of the linear track, for each behavioral state, for data recorded in the  
 15 ACC (left), and the hippocampus (right). Ensemble activity patterns consist of concatenated  
 16 epochs from a given behavioral state on the same side of the track. Data show means for  $N=3$   
 17 mice in the ACC (left), and  $N=4$  mice in the hippocampus (right). (b) An example trajectory-phase  
 18 cell recorded in the ACC (left), and an example place cell recorded in the hippocampus (right).  
 19 Black lines show the positions of the animals, and the green and red dots show activity of the  
 20 neurons during rightward and leftward running, respectively. (c) Distribution of decoding error of  
 21 trajectory phase for data recorded in the ACC (left), and the hippocampus (right). The decoder  
 22 was trained on data from running in one direction and tested on data from running in the other  
 23 direction. (d) Pearson correlation between ensemble activity patterns from different spatial  
 24 locations on the linear track, for data recorded in the ACC (left; averaged over  $N=3$  mice), and the  
 25 hippocampus (right; averaged over  $N=4$  mice). Ensemble activity patterns consist of concatenated  
 26 epochs from a given location, separated according to the two running directions. (e) Pearson  
 27 correlation between ensemble activity patterns from the two sides of the linear track, given the  
 28 same trajectory phase, for data recorded in the ACC (blue), and the hippocampus (red). Ensemble  
 29 activity patterns are defined as the mean event rate for each neuron given a spatial bin and  
 30 running direction. (f) Pearson correlation between ensemble activity patterns for different spatial  
 31 displacements on the linear track, for data recorded in the ACC (blue), and the hippocampus (red).  
 32 Correlations are averaged over mice and over the two running directions. Data in e-f show means  
 33  $\pm$  SEM, for  $N=3$  mice in the ACC (blue), and  $N=4$  mice in the Hippocampus (red).



## 1 **Internal representation of head direction during wake and REM sleep periods**

2 Since our approach does not rely on behavioral measurements, we next asked if we can  
3 use it to expose internal representations even when there is no correspondence between  
4 neuronal activity and the external stimulus or behavior. It has been shown that pairwise  
5 correlations between head direction neurons in the anterior dorsal nucleus of the  
6 thalamus (ADn) and the postsubiculum (PoS) are preserved during sleep<sup>19</sup>. Therefore,  
7 we analyzed published electrophysiological recordings from the ADn and the PoS<sup>19,20</sup> in  
8 mice foraging for food in open environments (**Fig. 4a**), and sought to compare the  
9 internal structure of neuronal activity during wake and sleep periods. We constructed  
10 neuronal ensemble activity vectors as described above for the Ca<sup>2+</sup> imaging data, and  
11 applied dimensionality reduction to the activity vectors, separately for wake periods and  
12 periods of REM sleep. This analysis exposed a ring structure in the reduced dimensional  
13 space of neuronal activity<sup>21,22</sup> for both wake and REM data (**Fig. 4b-c** and  
14 **Supplementary Fig. 1c-j**). By quantifying the internal dimension<sup>14</sup> and topology<sup>23–26</sup> of  
15 the data (**Supplementary Fig. 7a-d**), we found a one-dimensional structure  
16 (**Supplementary Fig. 8h**), with one component, one hole, and no spaces  
17 (**Supplementary Fig. 7e**, and **Supplementary Fig. 9i**), providing an additional indication  
18 that the encoded variable is indeed characterized by a ring topology both during wake  
19 and REM sleep periods. These properties are consistent with the encoding of head  
20 direction previously observed in the ADn and PoS<sup>19,27,28</sup>.

21 Based on the temporal contiguity of the network states (**Supplementary Fig. 8a-b**), we  
22 reconstructed the trajectory of the network within the neuronal activity space and  
23 validated it against the head direction of the mouse. This analysis confirmed that the  
24 reconstructed trajectory reflected the actual head direction, up to the internal symmetries  
25 of a ring to reflection and rotation (**Fig. 4d**, **Supplementary Fig. 8c-d**, and  
26 **Supplementary Movie 4**). By accounting for the activity of each neuron relative to the  
27 network activity states of the entire recorded population, we calculated the internal tuning  
28 curves, and found that they were similar to the external tuning curves (**Fig. 4e**,  
29 **Supplementary Fig. 8e-g**). By applying a similar analysis to the data recorded during  
30 REM sleep, we found that the internal tuning curves obtained exclusively during REM  
31 matched the head direction tuning curves during wake periods (**Fig. 4e**, **Supplementary**  
32 **Fig. 9c-g**, and **Supplementary Movie 5**). Remarkably, based on the internal tuning  
33 curves that were obtained during REM sleep, we were able to accurately decode the  
34 head direction (up to the ring's internal symmetry) while the mouse was awake and freely  
35 behaving (**Fig. 4f**). These observations suggest that in certain brain circuits the internal  
36 structure of neuronal activity is conserved irrespective of the animal's behavior.

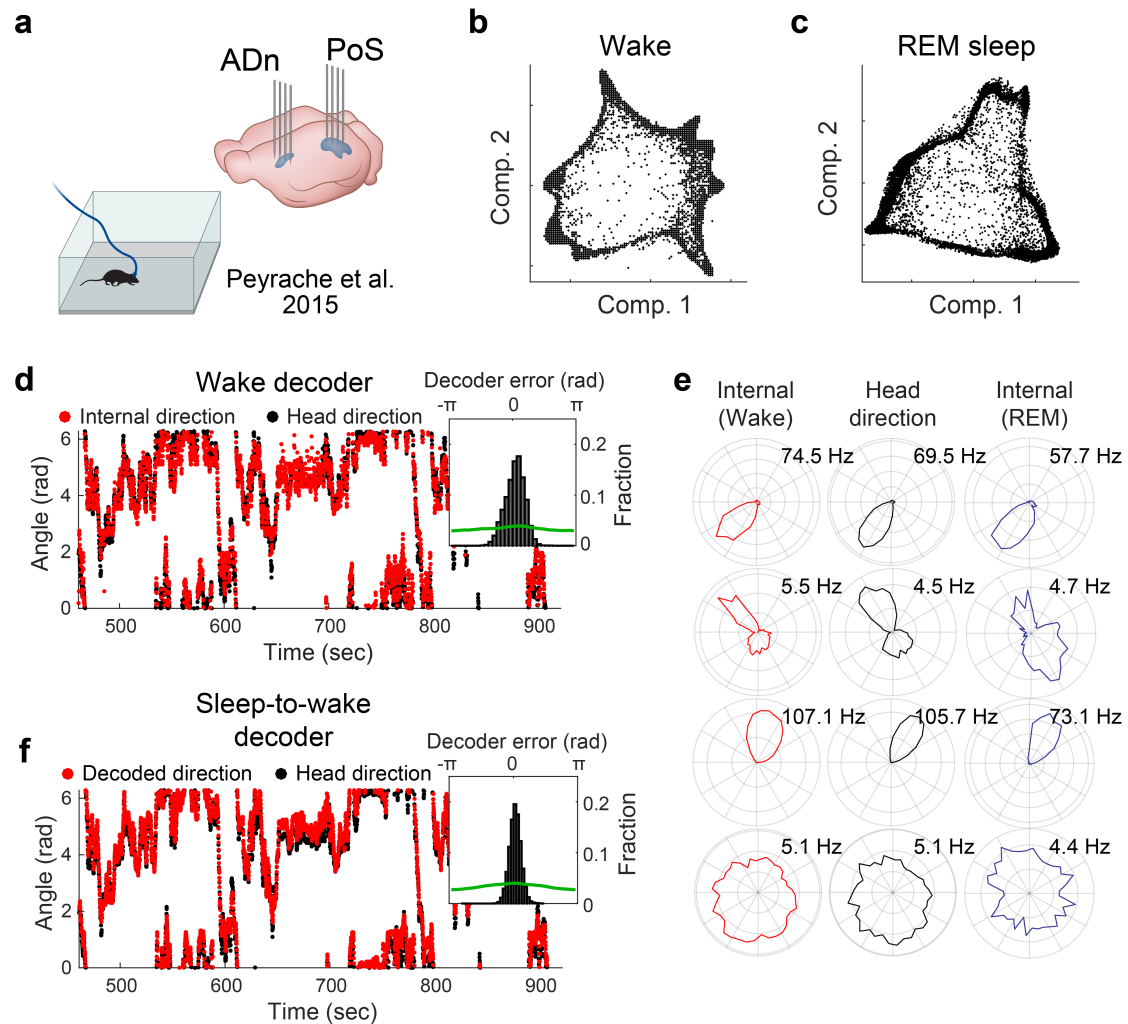

1 **Fig. 4: Internal representation of head direction during wake and REM sleep periods.** (a)  
2 Data were obtained from dense electrophysiological recordings in the ADn and PoS, in mice  
3 foraging for food in open environments. (b-c) The distribution of data points in the reduced  
4 dimensional space of neuronal activity is characterized by a ring topology, during wake periods (b)  
5 and during periods of REM sleep (c). Each data point corresponds to the neuronal activity within a  
6 single time frame. (d) The reconstructed internal direction (red) and the actual head direction  
7 (black). Inset, distribution of the error in the reconstruction of head direction (black), versus  
8 shuffled data (green). (e) Internal tuning curve, relative to the state of the network (left, red),  
9 external head direction tuning curve, relative to mouse behavior (center, black), and the internal  
10 tuning curves during periods of REM sleep (right, blue) for four representative cells. (f) The  
11 decoded head direction (red) and the actual head direction (black). Inset, distribution of the  
12 decoding error (black) versus shuffled data (green). The decoder is based on internal tuning  
13 curves obtained exclusively from sleep.  
14

15 **Conservation of the internal structure of neuronal activity over days and across**  
16 **individuals**

17 If the internal structure of neuronal activity reflects the computational processes  
18 undertaken by the network, then this structure should be an invariant property. To test  
19 this, we imaged neuronal activity in the hippocampus of mice that visited the same linear  
20 track on multiple days and found that the structure of neuronal activity remained similar  
21 over time (Fig. 5a), despite the substantial turnover of the active cells<sup>9,29</sup> (41-64%

1 overlap across days). The internal structure of neuronal activity in the hippocampus (**Fig.**  
2 **5b**) and in the ADn and PoS (**Fig. 5c**) was also similar across different mice. To assess  
3 the similarity of the internal structures between mice and over time, we sought to identify  
4 analogous activity patterns across data sets (from different mice or different days), and  
5 test whether these patterns are also associated with similar behaviors. We devised an  
6 across-mice or across-days decoder (**Fig. 5d**), and found that we could accurately infer  
7 the position (**Fig. 5e-f** and **Supplementary Movie 6**) or head direction (**Fig. 5g**) of a  
8 mouse, based on the mapping between the behavior and activity patterns in another  
9 mouse or another day. Overall, these results demonstrate the conservation of internal  
10 structures of neuronal activity over time and across mice.

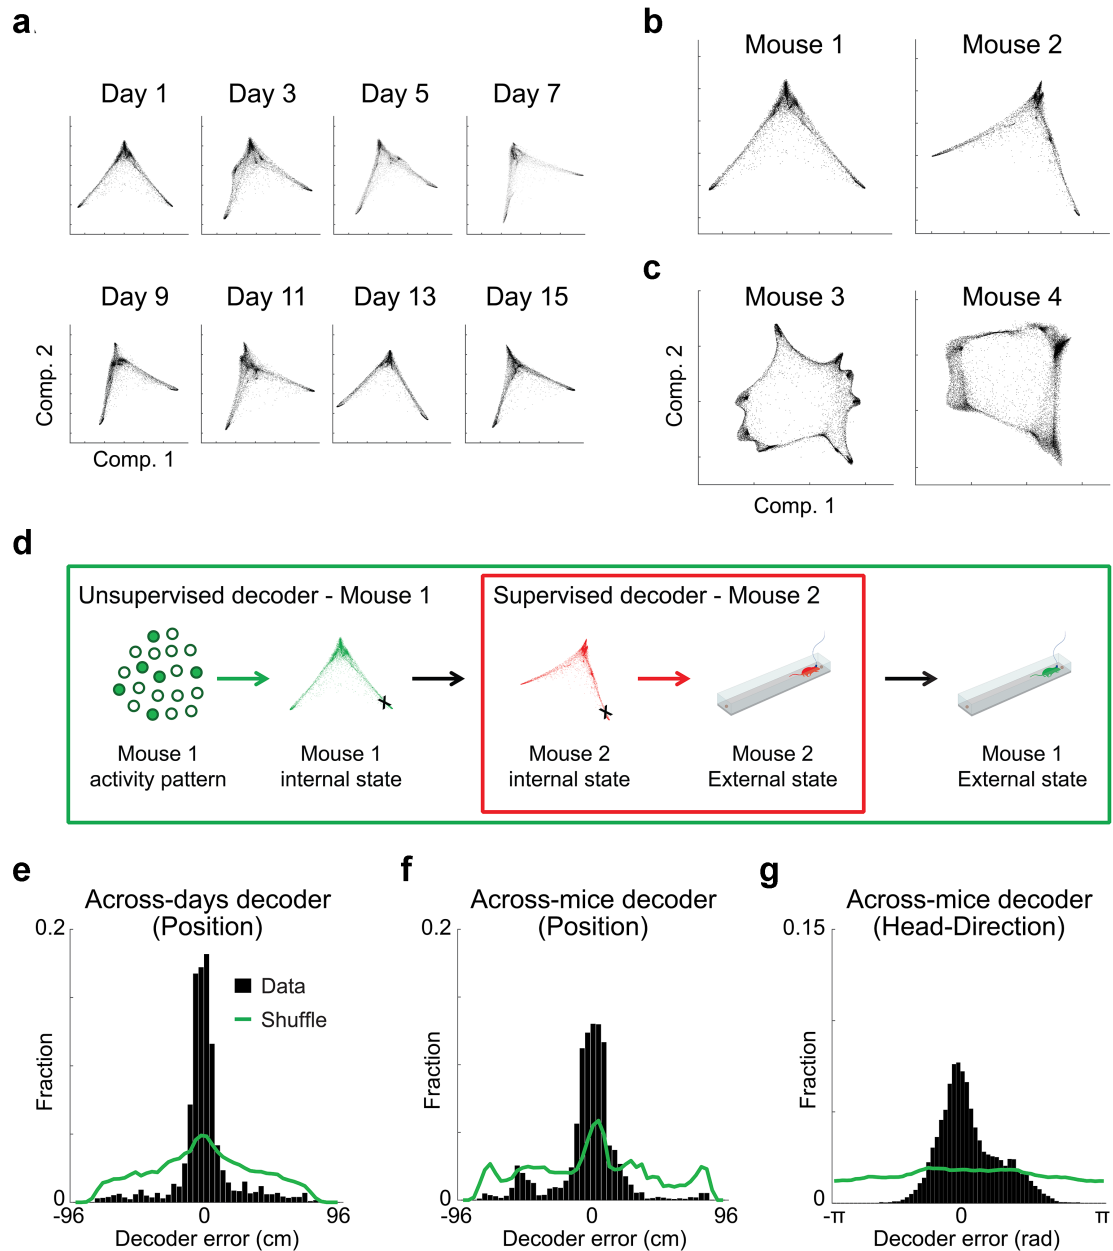

1  
2  
3  
4  
5  
6  
7  
8  
9  
10  
11  
12  
13  
14

**Fig. 5: The internal structure of neuronal activity is maintained across days and across mice.** (a) The distribution of data points in the reduced dimensional space of neuronal activity for hippocampal data from eight different days of the experiment. Note that the distribution of data points maintains a similar structure across days. (b-c) The distribution of points in the reduced dimensional space of neuronal activity for hippocampal data (b), and ADn/PoS data (c) from two different mice. (d) Workflow for the across-mice decoder. Neuronal activity in mouse 1 is associated with a specific network state within its internal structure of neuronal activity. Based on the similarity between internal structures, an analogous network state is found in mouse 2. This network state of mouse 2 is associated with a known external state. The decoded external state of mouse 1 is set as the same associated external state of mouse 2. (e-g) Distribution of decoding error for the across-days decoder for hippocampal data (e), the across-mice decoder for hippocampal data (f), and the across-mice decoder for ADn/PoS data (g).

## 1 **Discussion**

2 Here, we introduced a new approach for studying the neural code based on the attributes  
3 of neuronal activity itself. By applying dimensionality reduction to large-scale neuronal  
4 data, we show that the internal structure of neuronal activity allows revealing key  
5 properties of the neural code in a given brain circuit. Previous studies have used  
6 dimensionality reduction methods to explore population-level coding of variables of  
7 interest in high dimensional neural data<sup>5,30–36</sup>. Unlike previous applications of  
8 dimensionality reduction in neuroscience, we demonstrate that internal representations  
9 and tuning curves can be reconstructed from the internal structure of neuronal activity,  
10 and that such reconstructions can be achieved even in brain circuits where the encoded  
11 variable is unknown. While in this work we used LEM for dimensionality reduction, it is  
12 likely that the approach we introduced here could accommodate other dimensionality  
13 reduction methods as well. Our analysis suggests, however, that non-linear  
14 dimensionality reduction methods are more suitable for studying the internal structure of  
15 neuronal activity, as they allow extracting a structure that accurately reflects internal  
16 representations in cases that linear methods fail (**Supplementary Fig. 1**).

17 Since our approach relies on minimal prior assumptions, and is applied irrespective of the  
18 specific identity of the encoded variables, it could circumvent biases and limitations that  
19 are inherent to the standard method of calculating neuronal tuning curves. Furthermore,  
20 calculating internal tuning curves could alleviate the need to set non-adaptive and  
21 arbitrary boundaries between different behavioral states when calculating (external)  
22 tuning curves. For example, place fields are typically calculated after applying position  
23 and velocity thresholds to define periods of locomotion<sup>29,37</sup>, and only neuronal activity  
24 during those periods is considered in the analysis. Our results demonstrate that neuronal  
25 activity itself can be used to identify behavioral states and the boundaries between them,  
26 enabling analysis that is derived explicitly from the neuronal activity data.

27 We used our approach to study internal representations in the hippocampus and the  
28 ACC while mice were performing the same behavioral task. Although both brain circuits  
29 exhibited a discrete set of network states that corresponded to different locations and  
30 behaviors, their internal structures of neuronal activity differed, reflecting different types  
31 of internal representations. The hippocampus represented a combination of locations and  
32 actions, and these representations were different between opposite sides of the track. In  
33 contrast, our analysis of recordings from the ACC exposed schema-like representations  
34 of distances and actions that are similar across the opposite sides of the track, including  
35 the encoding of a previously unknown variable – the trajectory phase. Previous work  
36 demonstrated that the mPFC is important for the assimilation of newly acquired  
37 information against prior knowledge, suggesting an underlying schematic organization of

1 information<sup>38</sup>. Our findings are consistent with this notion, and specify how such schemas  
2 can be realized at the neural code level.

3 By studying internal representations of head direction in the ADn and PoS, we  
4 demonstrated that the internal structure of neuronal activity can reveal internal  
5 representations even when there is no correspondence between neuronal activity and  
6 the external stimulus or behavior (e.g., during sleep). A common practice is to train a  
7 decoder based on neuronal activity patterns that were defined during awake periods, to  
8 identify similar ‘virtual trajectories’ during sleep<sup>19,39,40</sup>. In contrast to this approach, we  
9 used activity patterns defined during sleep to decipher the behavior of awake animals,  
10 which allows decoding performance to be validated against an actual observed behavior.  
11 Overall, these results demonstrate that the internal structure of neuronal activity reflects  
12 computational properties inherent to a given neural circuit.

13 Recent studies have shown that different visits to the same familiar environment are  
14 encoded by different subsets of hippocampal neurons<sup>9,29</sup>. Consequently, it has been hard  
15 to reconcile how memories can be stably stored over the long term in a circuit that yields  
16 an ever-changing neural code. Our findings that the internal structure of neuronal activity  
17 remains stable over time raises the possibility that stability of the neural code is achieved,  
18 in part, through a stable relationship between neuronal population activity patterns. Such  
19 a stable relationship may also support the encoding of new information via its integration  
20 into a pre-existing structured code. We also demonstrated the conservation of the  
21 internal structures of neuronal activity between mice. This conservation allowed us to  
22 infer the position or head direction of a mouse, based on the mapping between the  
23 behavior and activity patterns in another mouse. Thus, the analogy between the internal  
24 structures allows the meaning of network states to be exported from one animal to  
25 another (up to the symmetry of the internal structure).

26 The internal structure of neuronal activity highlights general features of the computational  
27 task executed by a brain circuit. Consistent with this idea, recent studies have shown that  
28 the same neural circuit may similarly encode different external variables in different  
29 behavioral tasks<sup>41–43</sup>. For instance, non-spatial representations in the entorhinal cortex  
30 form a hexagonal grid-like pattern<sup>42,43</sup>, similar to the known spatial tuning of grid  
31 cells<sup>3,4,44</sup>. Since analogous tuning properties were observed in both cases, it is predicted  
32 that they would have the same internal structure of neuronal activity—a torus<sup>45,46</sup>. Thus,  
33 the internal structure of neuronal activity serves as a fingerprint of the computations  
34 carried out by different neural circuits, enabling to investigate their function, and even  
35 redefine their identity.

## 1 References and notes:

- 2 1. Hubel, D. H. & Wiesel, T. N. Receptive fields of single neurones in the cat's striate  
3 cortex. *J. Physiol.* **148**, 574–591 (1959).
- 4 2. O'Keefe, J. & Dostrovsky, J. The hippocampus as a spatial map. Preliminary evidence  
5 from unit activity in the freely-moving rat. *Brain Res.* **34**, 171–175 (1971).
- 6 3. Hafting, T., Fyhn, M., Molden, S., Moser, M. B. & Moser, E. I. Microstructure of a  
7 spatial map in the entorhinal cortex. *Nature* **436**, 801–806 (2005).
- 8 4. Fyhn, M., Molden, S., Witter, M. P., Moser, E. I. & Moser, M. B. Spatial representation  
9 in the entorhinal cortex. *Science* **305**, 1258–1264 (2004).
- 10 5. Goddard, E. *et al.* Interpreting the dimensions of neural feature representations  
11 revealed by dimensionality reduction. *Neuroimage* (2017).
- 12 6. Rubin, A., Yartsev, M. M. & Ulanovsky, N. Encoding of head direction by hippocampal  
13 place cells in bats. *J. Neurosci.* **34**, 1067–1080 (2014).
- 14 7. Low, R. J., Lewallen, S., Aronov, D., Nevers, R. & Tank, D. W. Probing variability in a  
15 cognitive map using manifold inference from neural dynamics. *bioRxiv* (2018).  
16 doi:10.1101/418939
- 17 8. Ghosh, K. K. *et al.* Miniaturized integration of a fluorescence microscope. *Nat.*  
18 *Methods* **8**, 871–878 (2011).
- 19 9. Rubin, A., Geva, N., Sheintuch, L. & Ziv, Y. Hippocampal ensemble dynamics  
20 timestamp events in long-term memory. *Elife* **4**, e12247 (2015).
- 21 10. Mukamel, E. A., Nimmerjahn, A. & Schnitzer, M. J. Automated analysis of cellular  
22 signals from large-scale calcium imaging data. *Neuron* **63**, 747–760 (2009).
- 23 11. Belkin, M. & Niyogi, P. Laplacian eigenmaps for dimensionality reduction and data  
24 representation. *Neural Comput.* **15**, 1373–1396 (2003).
- 25 12. Markus, E. J. *et al.* Interactions between location and task affect the spatial and  
26 directional firing of hippocampal neurons. *J. Neurosci.* **15**, 7079–7094 (1995).
- 27 13. McNaughton, B. L., Barnes, C. A. & O'Keefe, J. The contributions of position,  
28 direction, and velocity to single unit activity in the hippocampus of freely-moving rats.  
29 *Exp. Brain Res.* **52**, 41–49 (1983).
- 30 14. Grassberger, P. & Procaccia, I. Measuring the strangeness of strange attractors.  
31 *Phys. D Nonlinear Phenom.* **9**, 189–208 (1983).
- 32 15. Dalley, J. W., Cardinal, R. N. & Robbins, T. W. Prefrontal executive and cognitive  
33 functions in rodents: neural and neurochemical substrates. *Neurosci. Biobehav. Rev.*  
34 **28**, 771–784 (2004).
- 35 16. Shenhav, A., Botvinick, M. & Cohen, J. The expected value of control: an integrative  
36 theory of anterior cingulate cortex function. *Neuron* **79**, 217–240 (2013).
- 37 17. Weible, A. P. Remembering to attend: the anterior cingulate cortex and remote  
38 memory. *Behav. Brain Res.* **245**, 63–75 (2013).
- 39 18. Etkin, A., Egner, T. & Kalisch, R. Emotional processing in anterior cingulate and  
40 medial prefrontal cortex. *Trends Cogn. Sci.* **15**, 85–93 (2011).
- 41 19. Peyrache, A., Lacroix, M. M., Petersen, P. C. & Buzsáki, G. Internally organized  
42 mechanisms of the head direction sense. *Nat. Neurosci.* **18**, 569–575 (2015).
- 43 20. Peyrache, A. & Buzsáki, G. Extracellular recordings from multi-site silicon probes in  
44 the anterior thalamus and subicular formation of freely moving mice. *CRCNS.org*.  
45 <http://dx.doi.org/10.6080/K0G15XS1> (2015).
- 46 21. Chaudhuri, R., Ger, B., Pandey, B., Peyrache, A. & Fiete, I. R. The population  
47 dynamics of a canonical cognitive circuit. 1–21 (2019). doi:10.1101/516021
- 48 22. Rybakken, E., Baas, N. & Dunn, B. Decoding of Neural Data Using Cohomological  
49 Feature Extraction. *Neural Comput.* **31**, 68–93 (2019).
- 50 23. Carlsson, G. *Topology and data*. *Bulletin of the American Mathematical Society* **46**,  
51 (2009).
- 52 24. Ghrist, R. Barcodes: the Persistent Topology of Data. *Bull. Am. Math. Soc.* **45**, 61–75  
53 (2008).
- 54 25. Curto, C. & Itskov, V. Cell groups reveal structure of stimulus space. *PLoS Comput.*  
55 *Biol.* **4**, e1000205 (2008).
- 56 26. Dabaghian, Y., Mézoli, F., Frank, L. & Carlsson, G. A topological paradigm for  
57 hippocampal spatial map formation using persistent homology. *PLoS Comput. Biol.* **8**,  
58 (2012).
- 59 27. Taube, J. Head direction cells recorded in the anterior thalamic nuclei of freely moving

- 1 rats. *J. Neurosci.* **15**, 70–86 (1995).
- 2 28. Taube, J. S., Muller, R. U. & Ranck, J. B. Head-direction cells recorded from the  
3 postsubiculum in freely moving rats. I. Description and quantitative analysis. *J.*  
4 *Neurosci.* **10**, 420–35 (1990).
- 5 29. Ziv, Y. *et al.* Long-term dynamics of CA1 hippocampal place codes. *Nat. Neurosci.* **16**,  
6 264–266 (2013).
- 7 30. Harvey, C. D., Coen, P. & Tank, D. W. Choice-specific sequences in parietal cortex  
8 during a virtual-navigation decision task. *Nature* **484**, 62–68 (2012).
- 9 31. Ahrens, M. B. *et al.* Brain-wide neuronal dynamics during motor adaptation in  
10 zebrafish. *Nature* **485**, 471–477 (2012).
- 11 32. Mazor, O. & Laurent, G. Transient Dynamics versus Fixed Points in Odor  
12 Representations by Locust Antennal Lobe Projection Neurons. *Neuron* **48**, 661–673  
13 (2005).
- 14 33. Cunningham, J. P. & Yu, B. M. Dimensionality reduction for large-scale neural  
15 recordings. *Nat. Neurosci.* **17**, 1500–1509 (2014).
- 16 34. Gallego, J. Á., Perich, M. G., Miller, L. E. & Solla, S. A. Neural manifolds for the control  
17 of movement. *Neuron* **94**, 978–984 (2017).
- 18 35. Sadtler, P. T. *et al.* Neural constraints on learning. *Nature* **512**, 423–426 (2014).
- 19 36. Churchland, M. M. *et al.* Neural population dynamics during reaching. *Nature* **487**, 51–  
20 56 (2012).
- 21 37. Diba, K. & Buzsáki, G. Hippocampal network dynamics constrain the time lag between  
22 pyramidal cells across modified environments. *J. Neurosci.* **28**, 13448–13456 (2008).
- 23 38. Tse, D. *et al.* Schema-dependent gene activation and memory encoding in neocortex.  
24 *Science* **333**, 891–895 (2011).
- 25 39. Lee, A. K. & Wilson, M. A. Memory of sequential experience in the hippocampus  
26 during slow wave sleep. *Neuron* **36**, 1183–1194 (2002).
- 27 40. O'Neill, J., Boccara, C. N., Stella, F., Schoenenberger, P. & Csicsvari, J. Superficial  
28 layers of the medial entorhinal cortex replay independently of the hippocampus.  
29 *Science* **355**, 184–188 (2017).
- 30 41. Aronov, D., Nevers, R. & Tank, D. W. Mapping of a non-spatial dimension by the  
31 hippocampal–entorhinal circuit. *Nature* **543**, 719–722 (2017).
- 32 42. Constantinescu, A. O., O'Reilly, J. X. & Behrens, T. E. Organizing conceptual  
33 knowledge in humans with a gridlike code. *Science* **352**, 1464–1468 (2016).
- 34 43. Killian, N. J., Jutras, M. J. & Buffalo, E. A. A map of visual space in the primate  
35 entorhinal cortex. *Nature* **491**, 761–764 (2012).
- 36 44. Jacobs, J. *et al.* Direct recordings of grid-like neuronal activity in human spatial  
37 navigation. *Nat. Neurosci.* **16**, 1188–1190 (2013).
- 38 45. Witter, M. P. & Moser, E. I. Spatial representation and the architecture of the  
39 entorhinal cortex. *Trends Neurosci.* **29**, 671–678 (2006).
- 40 46. Yoon, K. *et al.* Specific evidence of low-dimensional continuous attractor dynamics in  
41 grid cells. *Nat. Neurosci.* **16**, 1077–1084 (2013).
- 42 47. Chen, T. W. *et al.* Ultrasensitive fluorescent proteins for imaging neuronal activity.  
43 *Nature* **499**, 295–300 (2013).
- 44 48. Sheintuch, L. *et al.* Tracking the same neurons across multiple days in Ca<sup>2+</sup> imaging  
45 data. *Cell Rep.* **21**, 1102–1115 (2017).
- 46



1 **Acknowledgments:**

2

3 Y.Z. is a CIFAR-Azrieli Global Scholar in the Brain, Mind & Consciousness program, and

4 an incumbent of the Daniel E. Koshland Sr. career development chair. Y.Z. is supported

5 by grants from the Abraham and Sonia Rochlin Foundation, the Hymen T. Milgrom Trust,

6 the Minerva Foundation, the Israel Science Foundation (grant 2184/14), the European

7 Research Council (ERC-StG 638644), and the FP7 Marie Curie actions (CIG 630852).

8 We thank Timothy O'Leary, Jerome Lecoq, Ofer Yizhar, Rony Paz, Nachum Ulanovsky,

9 Yadin Dudai, Misha Tsodyks, Rafi Malach, Michal Schwartz, Michal Rivlin, Yoram Burak,

10 and members of the Ziv lab for helpful advice and comments on the manuscript. We also

11 thank Adrien Peyrache and György Buzsáki for sharing their data sets.

## 1 **Supplementary materials:**

### 2 **Materials and methods**

#### 3 **Animals and surgical procedures**

4 All procedures were approved by the Weizmann Institute IACUC. We used male mice,  
5 aged 8-12 weeks at the beginning of the study. Mice designated for calcium imaging in  
6 the hippocampal CA1 were housed with 1-4 cage-mates, while mice used for imaging in  
7 the ACC were single housed. All cages contained running wheels. All surgical  
8 procedures were conducted under isoflurane anesthesia (1.5-2% volume). For  
9 hippocampal imaging, we used C57BL/6 wild type mice, which underwent two surgical  
10 procedures: virus injection and glass tube implantation. We injected 400 nL of the viral  
11 vector AAV2/5-CaMKIIa-GCaMP6f<sup>47</sup> (~2 X 10<sup>13</sup> particles per ml, packed by University of  
12 North Carolina Vector Core) to the CA1 at stereotactic coordinates: -1.9 mm antero-  
13 posterior, -1.4 mm mediolateral, -1.6 mm dorsoventral relative to the Bregma. The  
14 injected mice were allowed to recover in their home-cages for at least 1 week before the  
15 subsequent surgical procedure. We next implanted a glass guide tube directly above the  
16 CA1, as previously described<sup>9,29</sup>. For ACC imaging, we used CaMKII-tTA and TRE-  
17 GCaMP6s double transgenic mice (Jackson stock no 003010 & 024742; referred to as  
18 CaMKII-GCaMP6), bred on a C57BL/6 background. They were implanted directly with a  
19 micro-prism lens (800µm diameter) in the ACC. Stereotactic coordinates of the  
20 implantation were: 1 mm anterior-posterior, 0 mm mediolateral (measured relative to the  
21 medial side of the prism), -1.8 mm dorsoventral from bregma.

22

#### 23 **Ca<sup>2+</sup> imaging and behavioral setup**

##### 24 *Preparatory process*

25 For time-lapse imaging in freely behaving mice using an integrated miniature  
26 fluorescence microscope (nVistaHD, Inscopix), we followed a previously established  
27 protocol<sup>9,29</sup>. Briefly, at least 3 weeks after the surgical implantation procedure, we  
28 examined Ca<sup>2+</sup> indicator expression and tissue health by imaging mice under isoflurane  
29 anesthesia using a two-photon microscope (Ultima IV, Bruker, Germany), equipped with  
30 a tunable Ti: Sapphire laser (Insight, Spectra Physics, Santa Clara, CA). For the CA1  
31 implanted mice, we inserted into the guide tube a 'microendoscope' consisting of a single  
32 gradient refractive index lens (0.44 pitch length, 0.47 NA, GRINtech GmbH, Germany).  
33 We selected for further imaging only those mice that exhibited homogenous GCaMP6  
34 expression and healthy appearance of the tissue. For the selected CA1 implanted mice,  
35 we affixed the microendoscope within the guide tube using ultraviolet-curing adhesive  
36 (Norland, NOA81, Edmund Optics, Barrington, NJ). Next, we attached the microscope's

1 base plate to the dental acrylic cap using light cured acrylic (Flow-It ALC, Pentron,  
2 Orange, CA). All mice were returned to their home cages for several days following the  
3 aforementioned procedure.

4

#### 5 *Calcium imaging in freely behaving mice*

6 We trained the mice to run back and forth on an elevated 96cm linear track<sup>9</sup>. To record  
7 mouse behavior, we used an overhead camera (DFK 33G445, The Imaging Source,  
8 Germany), which was synchronized with the integrated microscope. Before initiating Ca<sup>2+</sup>  
9 imaging, we trained the mice for 3–11 days. Training and imaging sessions consisted of  
10 five to seven 3-min-long trials, with an inter-trial interval of 3 minutes. Ca<sup>2+</sup> imaging was  
11 performed at 20Hz or 10Hz in CA1 or ACC, respectively.

12

#### 13 **Processing of Ca<sup>2+</sup> imaging data**

14 We processed imaging data using commercial software (Mosaic, version 1.1.1b,  
15 Inscopix) and custom MATLAB routines as previously described<sup>9,29</sup>. To increase  
16 computation speed, we spatially down-sampled the data by a factor of two in each  
17 dimension (final pixel size of 2.3 X 2.3µm). To correct for non-uniform illumination both in  
18 space and time, we normalized the images by dividing each pixel by the corresponding  
19 value from a smoothed image. The smoothed image was obtained by applying a  
20 Gaussian filter with a radius of 100µm to the movies. Normalization also enhanced the  
21 appearance of the blood vessels, which were later used as stationary fiducial markers for  
22 image registration. We used a rigid-body registration to correct for lateral displacements  
23 of the brain. This procedure was performed on a high contrast subregion of the  
24 normalized movies at which the blood vessels were most prominent. The movies were  
25 transformed to relative changes in fluorescence,  $\frac{\Delta F(t)}{F_0} = (F(t) - F_0)/F_0$ , where  $F_0$  is the  
26 value for each pixel averaged over time. For cell detection, the movies were down-  
27 sampled in time by a factor of five. We detected spatial footprints corresponding to  
28 individual cells using an established cell detection algorithm that applies principal and  
29 independent component analyses (PCA and ICA). For each spatial footprint, we used a  
30 threshold of 50% of the footprint's maximum intensity, and each pixel that did not cross  
31 the threshold was set to zero. After the cells were detected, further cell sorting was  
32 performed to identify the spatial footprints that follow a typical cellular structure. This was  
33 done by measuring the footprint area and circularity, and discarding those whose radius  
34 was smaller than 5µm or larger than 15µm, or which had a circularity smaller than 0.8. In  
35 some cases, the output of the PCA/ICA algorithm included more than one component  
36 that corresponded to a single cell. To eliminate such occurrences, we examined all pairs

1 of cells with centroid distances  $< 18\mu\text{m}$  and whenever their traces had a correlation  $> 0.9$ ,  
2 the cell with the lower average event peak amplitude was discarded. To identify the same  
3 neurons across multiple imaging sessions, we used a probabilistic method for cell  
4 registration<sup>48</sup>, which estimates the probability of correct registration for each cell in the  
5 data set, and the overall rates of registration errors.

6

### 7 **Detection of $\text{Ca}^{2+}$ events**

8  $\text{Ca}^{2+}$  activity was extracted by applying the thresholded spatial footprints to movies at full  
9 temporal resolution (20Hz)  $\Delta F(t)/F_0$ . Baseline fluctuations were removed by subtracting  
10 the median trace (20 sec sliding window). The  $\text{Ca}^{2+}$  traces were smoothed with a low-  
11 pass filter with a cutoff frequency of 2Hz.  $\text{Ca}^{2+}$  candidate events were detected whenever  
12 the amplitude crossed a threshold of 4 or 5 median absolute deviations (MAD), for  
13 GCaMP6s or GCaMP6f, respectively. We considered for further analysis only candidate  
14  $\text{Ca}^{2+}$  events with indicator decay time for GCaMP6s or GCaMP6f equal to or longer than  
15 600msec or 200msec, respectively. In order to avoid the detection of several peaks  
16 corresponding to a single  $\text{Ca}^{2+}$  event, only peaks that were 4 or 5 MAD higher than the  
17 previous peak (within the same candidate event) and 2 or 2.5 MAD higher than the next  
18 peak, for GCaMP6s or GCaMP6f, respectively, were regarded as true events. We set the  
19  $\text{Ca}^{2+}$  event occurrence to the time of the peak fluorescence. To mitigate the effects of  
20 crosstalk (i.e., spillover of  $\text{Ca}^{2+}$  fluorescence from neighboring cells), we adopted a  
21 conservative approach, allowing only one cell from a group of neighbors (pairs of cells  
22 with centroid distances  $< 18\mu\text{m}$ ) to register a  $\text{Ca}^{2+}$  event in any 200msec time window. If  
23 multiple  $\text{Ca}^{2+}$  events occurred within  $\sim 200\text{msec}$  in neighboring cells, we retained only the  
24 event with highest peak  $\Delta F(t)/F_0$  value. If two neighboring cells had a correlation  $> 0.9$  in  
25 their events, the cell with the lower average peak amplitude was discarded. After the  
26 events were identified, further event sorting was performed to find the cells with sufficient  
27 signal-to-noise ratios. This was done by measuring the event rate and the average event  
28 peak amplitude for each cell and discarding those whose event rate was smaller than  
29 0.01Hz or which had an average event amplitude smaller than 1% ( $\Delta F(t)/F_0$ ). We  
30 considered each neuron to be active for two consecutive frames at the peak of each  
31 detected  $\text{Ca}^{2+}$  transient (to account for the typical  $\text{Ca}^{2+}$  indicator rise time).

32

### 33 **Electrophysiology in the subiculum and thalamus**

34 We obtained published electrophysiology recordings<sup>20</sup> from multiple anterior thalamic  
35 nuclei, mainly the anterodorsal nucleus (ADn), and subicular areas, mainly the post-  
36 subiculum (PoS), in freely moving mice foraging for food in an open environment (53 x 46

1 cm). The authors recorded at 20kHz, simultaneously from 64 to 96 channels, and  
2 processed the raw data to extract the LFPs and detect spikes.

3

#### 4 **Obtaining the data points**

5 For  $\text{Ca}^{2+}$  imaging data, we constructed a binary activity matrix of size  $N \times K$ , where  $N$  is  
6 the number of neurons and  $K$  is the number of frames in the movies tracking  $\text{Ca}^{2+}$   
7 dynamics. The  $i^{\text{th}}$  by  $j^{\text{th}}$  element of the matrix was set to 1 if the  $i^{\text{th}}$  neuron was active in  
8 the  $j^{\text{th}}$  frame, and was otherwise set to 0. We then defined each data point as a frame-  
9 level binary activity vector of length  $N$ , namely, a row of the activity matrix. For further  
10 analysis of the data, we used only frame-level activity vectors with  $>1$  active neurons  
11 (non-zero elements).

12 For electrophysiology data, we first binned the activity of the neurons using a 100msec  
13 time bin. We then constructed a binary activity matrix of size  $N \times K$ , where  $N$  is the number  
14 of neurons and  $K$  is the number of time bins. The  $i^{\text{th}}$  by  $j^{\text{th}}$  element of the matrix was set to  
15 1 if the  $i^{\text{th}}$  neuron fired at least one time during the  $j^{\text{th}}$  time bin, and was otherwise set to 0.  
16 We then defined each data point as a bin-level binary activity vector of length  $N$ , namely,  
17 a row of the activity matrix. For dimensionality reduction and further analysis of the data,  
18 we discarded activity vectors with  $<15$  active neurons.

19

#### 20 **Dimensionality reduction**

21 Non-linear dimensionality reduction techniques enable identification of sets of activity  
22 patterns which lay in a low dimension manifold, within the high dimension of the data ( $N$ ,  
23 number of neurons), even if this manifold is non-linear (**Supplementary Fig. 1**). To this  
24 end, we used Laplacian Eigenmaps (LEM) for non-linear dimensionality reduction as  
25 previously described<sup>11</sup>. In general, such techniques utilize the local relationships between  
26 proximal data points to reconstruct a global distance metric. Given  $K$  data points  $x_1, \dots, x_K$   
27 (number of frames) lying in an  $N$ -dimensional space of neuronal activity, we constructed  
28 a weighted graph with  $K$  nodes, one for each point, and a set of edges connecting  
29 neighboring data points. We considered nodes  $i$  and  $j$  to be connected by an edge if  $i$  is  
30 among  $p$  of the nearest neighbors of  $j$ , or  $j$  is among  $p$  of the nearest neighbors of  $i$   
31 ( $p=0.25-0.5\%$  for all data sets). We used the parameter free (“simple minded”) method  
32 for choosing the weights, i.e.,  $W_{ij}=1$  if nodes  $i$  and  $j$  are connected, and 0 otherwise<sup>11</sup>.  
33 We then computed the eigenvalues and eigenvectors for the generalized eigenvector  
34 problem:  $Lf = \lambda Df$ , where  $D$  is the diagonal weight matrix, and its entries are column  
35 sums of  $W$ , and  $L = D - W$  is the Laplacian matrix. We left out the leading eigenvector  
36 (as previously described<sup>11</sup>) and used the next 10 eigenvectors for embedding in a 10-

1 dimensional Euclidean space. The LEM was performed twice. For the second iteration,  
2 performed on the reduced dimensional data, we defined nodes  $i$  and  $j$  as connected if  $i$  is  
3 among  $p$  of the nearest neighbors of  $j$ , or  $j$  is among  $p$  of the nearest neighbors of  $i$   
4 ( $p=7.5-15\%$  for all data sets). For further analysis, we used the three leading  
5 eigenvectors (after leaving out the first eigenvector).

6

## 7 **Estimation of data internal dimensionality and topology**

8 To estimate the internal dimension of the data, for any given data point in the reduced  
9 space, we calculated the number of neighbors within a sphere surrounding it, as a  
10 function of the sphere's radius. We used the slope of the number of neighboring data  
11 points within a given radius on a log-log scale to estimate the dimension of the data<sup>14</sup>. A  
12 simulation illustrating this procedure is presented in **Supplementary Fig. 2**.

13 To estimate the topology of the data, we calculated the numbers of components ( $\beta_0$ ),  
14 holes ( $\beta_1$ ), and spaces ( $\beta_2$ ), as a function of the radius threshold, using a previously  
15 established algorithm<sup>23</sup> (Javaplex: A research software package for persistent (co)  
16 homology, <https://github.com/appliedtopology/javaplex>). We then searched for  
17 components, holes, and spaces that were stable across a wide range of radii. A  
18 simulation illustrating this procedure is presented in **Supplementary Fig. 7**. Since the  
19 algorithm is computationally demanding and is not scalable to large data sets, we applied  
20 the algorithm to a representative set of data points. To obtain this representative set, we  
21 applied a clustering procedure (K-means) on the reduced dimensional data and extracted  
22 the centroids of the clusters. To overcome sensitivity to noise, we discarded sparse  
23 clusters (<50 data points). To ensure a final number of cluster centroids >50, we used  
24  $K=70$  for the K-means procedure.

25

## 26 **K-means clustering**

27 In cases in which the data points are continuously distributed, there is no natural  
28 separation of the data points into discrete clusters. Therefore, for parameterization of the  
29 encoded variable, we used K-means, which yielded segmentation of the data into a  
30 discrete set of compact subsets. For electrophysiology data, we used K-means ( $K=8$ ) to  
31 segment the data into different clusters.

32

## 33 **Topological clustering and sub-clustering**

34 In cases in which the distribution of data points consists of a discrete set of dense  
35 clusters, these clusters can be considered as components in terms of data-topology, and

1 the same algorithm that estimates the number of components ( $\beta_0$ , see estimation of data  
2 internal topology) naturally yields a topological-based clustering of the data points. To  
3 utilize the topological approach for data clustering, we focused on large components  
4 (>250 data points for clustering and >50 data points for sub-clustering), and chose a  
5 radius that captures the maximal number of stable components (see estimation of data  
6 internal topology). To assign data points that do not belong to one of the defined  
7 components, we associated each unassigned data point with the cluster that contains its  
8 nearest assigned neighbor. This procedure was performed by gradually increasing the  
9 radius threshold, while not changing the assignment of previously assigned data points.

10

### 11 **Temporal segmentation of the data**

12 For the  $\text{Ca}^{2+}$  imaging data from the CA1 and ACC, we used the temporal sequence of  
13 clusters to temporally segment the data. Applying a segmentation procedure to the data  
14 points allowed us to define the beginning and end of each time segment, and at the  
15 same time, reduce the number of short deviations from a given cluster that could result  
16 from noise and sparse neuronal activity. To segment the data points, we defined two  
17 thresholds: (1) maximal interval between consecutive data points that belong to the same  
18 cluster; (2) minimal number of data points within a segment. To optimize the  
19 segmentation procedure, we systematically tested different values of the maximal interval  
20 threshold and examined the obtained distribution of segment lengths. A suitable  
21 threshold should result in a robust distribution (not sensitive to small changes of  
22 threshold value) of segment lengths. The distribution of number of data points in a  
23 candidate segment was clearly bimodal, which allowed valid segments to be  
24 distinguished from noise. We performed segmentation independently for each cluster  
25 enabling data points to belong to a single cluster, multiple clusters, or none of the  
26 clusters. In practice, the majority of data points belonged to a segment of only one  
27 cluster. After segmenting the data, we constructed an average activity vector by  
28 measuring the average activity of each neuron during a given time segment. For each set  
29 of segments from the same cluster, we applied principal component analysis (PCA) to  
30 the obtained average activity vectors to expose intra-cluster heterogeneity,  
31 corresponding to different segment subtypes within a given cluster.

32

### 33 **Calculating the transition matrix**

34 To capture the temporal relationship between the different network states, we calculated  
35 the transition matrix, i.e., the probability of a data point to belong to cluster  $i$  at time  $t+1$   
36 given that the preceding point belongs to cluster  $j$  at time  $t$ . Similar analysis was

1 performed at the segment level where the transition matrix was defined by the probability  
2 of a segment to belong to cluster  $i$  given that the preceding segment belongs to cluster  $j$ .

3

#### 4 **Temporal ordering of clusters and sub-clusters**

5 For the  $\text{Ca}^{2+}$  imaging data from the CA1 and ACC, we examined the internal structure of  
6 the data within a given cluster or segment subtype. We sub-clustered the reduced  
7 dimensional data points using topological clustering as described above. To evaluate the  
8 temporal ordering of the sub-clusters, for each possible ordering (i.e. permutation), we  
9 calculated the sum of probabilities of moving from each sub-cluster to its consecutive  
10 sub-cluster. The ordering  $\hat{I}$  of the  $M$  sub-clusters was set as the order that maximized the  
11 sum of probabilities out of the  $M!$  possible permutations.

$$12 \quad \hat{I} = \underset{I}{\operatorname{argmax}} \left( \sum_{i=1}^{M-1} P_{I_i, I_{i+1}} \right)$$

13 Since examining all possible permutations is computationally demanding, we first  
14 calculated the number of times that each sub-cluster appeared at the beginning and at  
15 the end of a segment. The analysis revealed that one sub-cluster was prominent at the  
16 start of a segment and another sub-cluster was prominent at the end of the segment,  
17 implying a specific directionality for the ordering of the sub-clusters. This allowed us to  
18 constrain the first and last sub-clusters among the  $M$  sub-clusters, and consequently we  
19 had to examine only  $(M-2)!$  possible permutations rather than  $M!$ .

20 For electrophysiology data from the ADn and PoS, due to the observed ring topology of  
21 the reduced dimensional data (**Supplementary Fig. 7**) and the trajectory within it  
22 (**Supplementary Fig. 8a-b**), we sought to cyclically order the obtained  $M$  clusters. To this  
23 end, for each ordering, we calculated the sum of probabilities for moving from a cluster to  
24 its neighboring clusters from both directions. The cyclical ordering of sub-clusters was set  
25 to maximize the sum of these probabilities, out of the  $(M-1)!/2$  possible orders (due to  
26 rotation and reflection symmetry). The ordered states of neuronal activity allowed us to  
27 reconstruct the encoded variables and calculate the internal tuning curve for each cell.

28

#### 29 **Reconstruction of the encoded variables**

30 To reconstruct the variables encoded within the network activity, we parameterized the  
31 network states. For  $\text{Ca}^{2+}$  imaging data from the CA1, we focused on the reconstruction  
32 of an internal position within clusters associated with locomotion. We used the obtained  
33 sub-clusters and their ordering, and assigned evenly spaced internal positions to the  
34 different sub-clusters. For comparison with the external position, we set the reflection



1 degree of freedom (out of the two possible orientations of the linear track due to its  
2 symmetry) by minimizing the mean squared error between the internal reconstruction and  
3 the external variable (performed globally for the entire data set). The error (mismatch)  
4 between the estimated position (or phase) based on the reconstructed internal  
5 representation  $\hat{x}$ , and the actual position (or phase)  $x$ , was defined as  $\hat{x} - x$ .

6 For electrophysiology data from the ADn and PoS, we reconstructed the internal angle  
7 based on the clustering of the entire data set, and the obtained cyclical ordering of the  
8 clusters. Data points that belong to cluster  $k$  were assigned an internal angle of  $\frac{2\pi k}{M}$ ,  
9 where  $M$  is the number of clusters. We then used a truncated Gaussian kernel  $W$  ( $\sigma = 2$   
10 frames, size = 5 frames) to temporally smooth the data. For comparison with the head  
11 direction, we set the rotation and reflection degrees of freedom (due to the symmetries of  
12 a ring) by minimizing the mean squared error between the internal reconstruction and the  
13 external variable (performed globally for the entire data set). The mismatch between the  
14 estimated head direction based on the reconstructed internal representation  $\hat{\theta}$ , and the  
15 actual head direction  $\theta$ , (or the decoded head direction during sleep; see *REM sleep*  
16 *decoder*) was defined as  $\text{mod}(\hat{\theta} - \theta + \pi, 2\pi) - \pi$ .

17

## 18 **Calculation of internal tuning curves**

19 We sought to calculate the tuning curve for each cell relative to the state of the network,  
20 rather than relative to any external variable (e.g., position). For this calculation, we first  
21 measured the time the network spent (occupancy) at any given state and the number of  
22 neuronal activity events within each network state ( $\text{Ca}^{2+}$  event number or number of  
23 spikes). We then divided the number of neuronal activity events by the occupancy,  
24 obtaining the activity rate as a function of the internal state of the network – hence the  
25 internal tuning curve.

26 For  $\text{Ca}^{2+}$  imaging data from the CA1 and ACC, we focused on the reconstruction of  
27 internal tuning curves within clusters associated with locomotion. Internal tuning curves  
28 were calculated for cells that displayed  $>5$   $\text{Ca}^{2+}$  events within the relevant clusters. For  
29 comparison with external tuning curves, after we calculated the occupancy and  $\text{Ca}^{2+}$   
30 event number vectors, we interpolated the  $\text{Ca}^{2+}$  event number and the occupancy at the  
31 ordered network states (sub-clusters) to increase the number of states so it will match the  
32 number of spatial bins. We then used a truncated Gaussian kernel ( $\sigma = 1.5$  bins, size = 5  
33 bins, as used for calculation of external tuning curves) to smooth the two functions.  
34 Finally, we computed the internal tuning curve for each neuron by dividing the smoothed  
35 map of  $\text{Ca}^{2+}$  event numbers by the smoothed map of occupancy.

1 For electrophysiology data from ADn and PoS, the internal tuning curves were calculated  
2 based on the clustering of the entire data set, and the obtained cyclical ordering of the  
3 clusters. Data points were smoothed as described above (see *Reconstruction of the*  
4 *encoded variables*). We then binned the internal angle into 40 bins of  $9^\circ$  and calculated  
5 the occupancy at any given angular bin and the neuron's number of spikes within each  
6 bin. Finally, we computed the internal tuning curve for each neuron by dividing the  
7 number of spikes by the occupancy.

8

### 9 **Calculation of external tuning curves**

10 For  $\text{Ca}^{2+}$  imaging data from the CA1 and ACC, we calculated the tuning of cells to  
11 location. We considered periods wherein the mouse ran  $> 1\text{cm/sec}$ . We divided the track  
12 into 24 bins (4cm each), and excluded the last 2 bins at both ends of the tracks where the  
13 mouse was generally stationary. We computed the occupancy and the number of  $\text{Ca}^{2+}$   
14 events in each bin, and then smoothed these two maps (occupancy and  $\text{Ca}^{2+}$  event  
15 number) using a truncated Gaussian kernel ( $\sigma = 1.5$  bins, size = 5 bins)<sup>9,29</sup>. We then  
16 computed the activity map (event rate per bin) for each neuron by dividing the smoothed  
17 map of  $\text{Ca}^{2+}$  event numbers by the smoothed map of occupancy. For hippocampal data  
18 we separately considered place fields for each of the two running directions on the linear  
19 track. For data recorded from the ACC, we pooled the data from both running directions  
20 on the linear track while taking into account the running phase rather than the absolute  
21 location. The pooling was performed by flipping the positional indexing of the linear track  
22 while the mouse was running in a given direction (this way, a given position on the track  
23 while the mouse was running to the right corresponded to the mirror location while the  
24 mouse was running to the left).

25 For the electrophysiology data from the ADn and PoS, we computed the tuning to head  
26 direction. We first binned head directions into 40 bins of  $9^\circ$ . We then calculated for each  
27 neuron the average firing rate given an angular bin, by dividing the number of spikes in  
28 each bin by the occupancy within that bin.

29

### 30 **Comparison between internal and external tuning curves**

31 For  $\text{Ca}^{2+}$  imaging data from the CA1 and ACC, we measured the mismatch between the  
32 internal and external tuning curves. For CA1 data the mismatch was defined as the  
33 difference between the internal and external preferred position, and for the ACC it was  
34 defined as the difference between the internal and external phase. To test the  
35 significance of the similarity in the coding properties, we compared the average absolute

1 mismatch to that obtained for 1,000 shuffled data sets. For each of the 1,000 shuffled  
2 sets, we shuffled between the identities of the cells.

3 For the electrophysiology data from the ADn and PoS, we quantified the angular tuning  
4 of each neuron and compared between the internal and external tuning curves. To  
5 quantify the angular tuning, we calculated for each angular tuning curve (either to internal  
6 angle or to head direction) the Rayleigh vector:  $\sum_{k=1}^N r(\theta_k) e^{-i\theta_k} / \sum_{k=1}^N r(\theta_k)$ , where N is  
7 the number of evenly spaced angular bins,  $\theta_k = \frac{2\pi k}{N}$ , and  $r(\theta)$  is the firing rate of the  
8 neuron given the angle  $\theta$ . The preferred direction of a neuron was estimated by the angle  
9 of the Rayleigh vector of its tuning curve, and the directionality (the degree of its tuning to  
10 a single direction) was estimated by the absolute value (length) of the Rayleigh vector.  
11 For both preferred direction and directionality (Rayleigh vector length) we compared the  
12 values obtained for each neuron from the internal and external tuning curves. To further  
13 compare the internal and external tuning curves of each neuron, we calculated the  
14 Pearson correlation between the two tuning curves. For the visualization of the data in  
15 **Supplementary Fig. 8e-g**, we labeled cells as head-directions cells if they had Rayleigh  
16 vector length of  $>0.5$  and peak firing rate  $>5\text{Hz}$ .

17 In both cases, in order to compare the internal tuning curves to the external tuning  
18 curves, we used the same degrees of freedom obtained in the *Reconstruction of the*  
19 *encoded variables* (described above).

20

### 21 **REM sleep decoder**

22 For the electrophysiology data from the ADn and PoS, we calculated the 'virtual  
23 trajectory' of the internal angle during REM sleep periods as described above (see  
24 *Reconstruction of the encoded variables*). Since the actual head direction is constant  
25 during sleep, the internal angle was compared to the 'virtual trajectory' of head direction  
26 obtained by a maximum likelihood decoder. The maximum likelihood decoder for virtual  
27 head direction during REM sleep was based on the external tuning curves during wake  
28 periods, using only head direction cells ( $>0.5$  Rayleigh vector length and  $>5\text{Hz}$  peak firing  
29 rate). For comparison between the internal angle and the decoded head direction, we  
30 sought the rotation and reflection degrees of freedom (due to the symmetries of a ring)  
31 that minimize the decoding mean squared error.

32

### 33 **REM sleep to wake decoder**

34 We trained a decoder during periods of REM sleep and tested it during periods of awake  
35 behavior. The internal angle and internal tuning curves were first calculated for REM  
36 sleep data, as described above (see *Calculation of internal tuning curves*), and were then

1 used to train a maximum likelihood decoder (**Fig. 4f**). Next, the decoder was tested on  
2 neuronal activity from awake periods. For comparison of the decoded head direction with  
3 the actual head direction, we sought the rotation and reflection degrees of freedom (due  
4 to the symmetries of a ring) that minimize the decoding mean squared error (inset of **Fig.**  
5 **4f**). The decoding error was compared to that obtained for shuffled data (see *Shuffle*  
6 *test*).

7

## 8 **Across-mice decoder**

9 Across-mice decoders rely on the analogy between the internal structures of neuronal  
10 activity across different mice (or different days of the experiment) for the same brain  
11 region. These decoders were used to infer the external state (position or head direction)  
12 of one mouse based on the relations between internal state (neuronal activity patterns)  
13 and external state of another mouse (or of the same mouse at another day of the  
14 experiment). We used the neuronal activity within the reduced dimensional space to  
15 parametrize data points within the internal state. Specifically, for the  $\text{Ca}^{2+}$  imaging data,  
16 clusters and ordered sub-clusters therein were translated into position on a 1D segment.  
17 For electrophysiology data, we used the circular order of the clusters to assign an angle  
18 to each data point. Based on this parametrization, we defined mapping across network  
19 states within internal structures obtained for different mice (or different days for the same  
20 mouse). In all cases, the mapping was defined up to the internal symmetry of the internal  
21 structure: rotation and reflection for PoS and ADn data and reflection for the CA1 data.  
22 For mouse 1, neuronal activity at each time frame was associated with a specific network  
23 state. Based on the similarity between internal structures, an analogous network state is  
24 found in mouse 2. This network state of mouse 2 is associated with a known external  
25 state. The decoded external state of mouse 1 was set as the same associated external  
26 state of mouse 2. The external state decoding error was calculated and compared to that  
27 obtained for shuffled data (see *Shuffle test*).

28

## 29 **Phase decoder**

30 For  $\text{Ca}^{2+}$  imaging data recorded from the ACC, we tested the similarity between neuronal  
31 activity during running in one direction of the linear track and the neuronal activity during  
32 running in the other direction. We first defined the trajectory phase as the distance of the  
33 mouse from the starting point, namely, the distance from the left edge when running  
34 rightward and the distance from the right edge when running leftward. We then  
35 constructed a decoder that estimates the trajectory phase in a given direction (test data)  
36 based on the relations between neuronal activity pattern and trajectory phase in the other

1 direction (training data). Specifically, for each data point obtained during running in a  
2 given direction, we found its nearest neighbor in the reduced space of neuronal activity  
3 among all data points obtained during running in the opposite direction. The decoded  
4 phase was set as the animal's trajectory phase at the time of the nearest neighbor data  
5 point. The trajectory phase decoding error was calculated and compared to that obtained  
6 for shuffled data (see *Shuffle test*).

7

## 8 **Shuffle test**

9 To test the significance of decoding accuracy, we measured the difference between the  
10 decoded values and the measured behavior at each time bin. We then compared the  
11 performance of each of the decoders described above to the performance obtained for  
12 1,000 shuffled data sets. For each of the 1,000 shuffled sets, we shuffled the decoded  
13 values across the different time bins, and set the degrees of freedom (rotation and  
14 reflection for angle, and reflection for position) to those that minimized the decoding  
15 mean squared error (done separately for each shuffle).

16

## 17 **Labeling of behavioral states**

18 For Ca<sup>2+</sup> imaging data from the CA1 and ACC, we manually labeled the behavior of the  
19 mouse. To identify periods corresponding to behavioral states of "Running", "Drinking",  
20 "Turning", and "Rearing", we analyzed the movies from the overhead camera that tracked  
21 animal behavior using video tracking software (EthoVision XT 11.5). We manually tagged  
22 the beginnings and ends of each behavioral state throughout each movie. Further  
23 separation of the running state to the start and end of running was done based on animal  
24 position along the linear track: "Start run" and "End run" were defined from the starting  
25 point to the center of the linear track, and from the center to the end point of the track,  
26 respectively. This behavioral labeling was used both for the comparison with neuronal  
27 clustering (**Fig. 2f**), and for the calculation of correlations between representations of  
28 behavioral states (**Supplementary Fig. 6**).

29

## 30 **Statistical analysis**

31 Statistical analysis was conducted using MATLAB 2016b software. One-tailed unpaired t-  
32 test with Holm–Bonferroni correction for multiple comparisons was conducted for  
33 between-regions comparisons of activity correlation level.

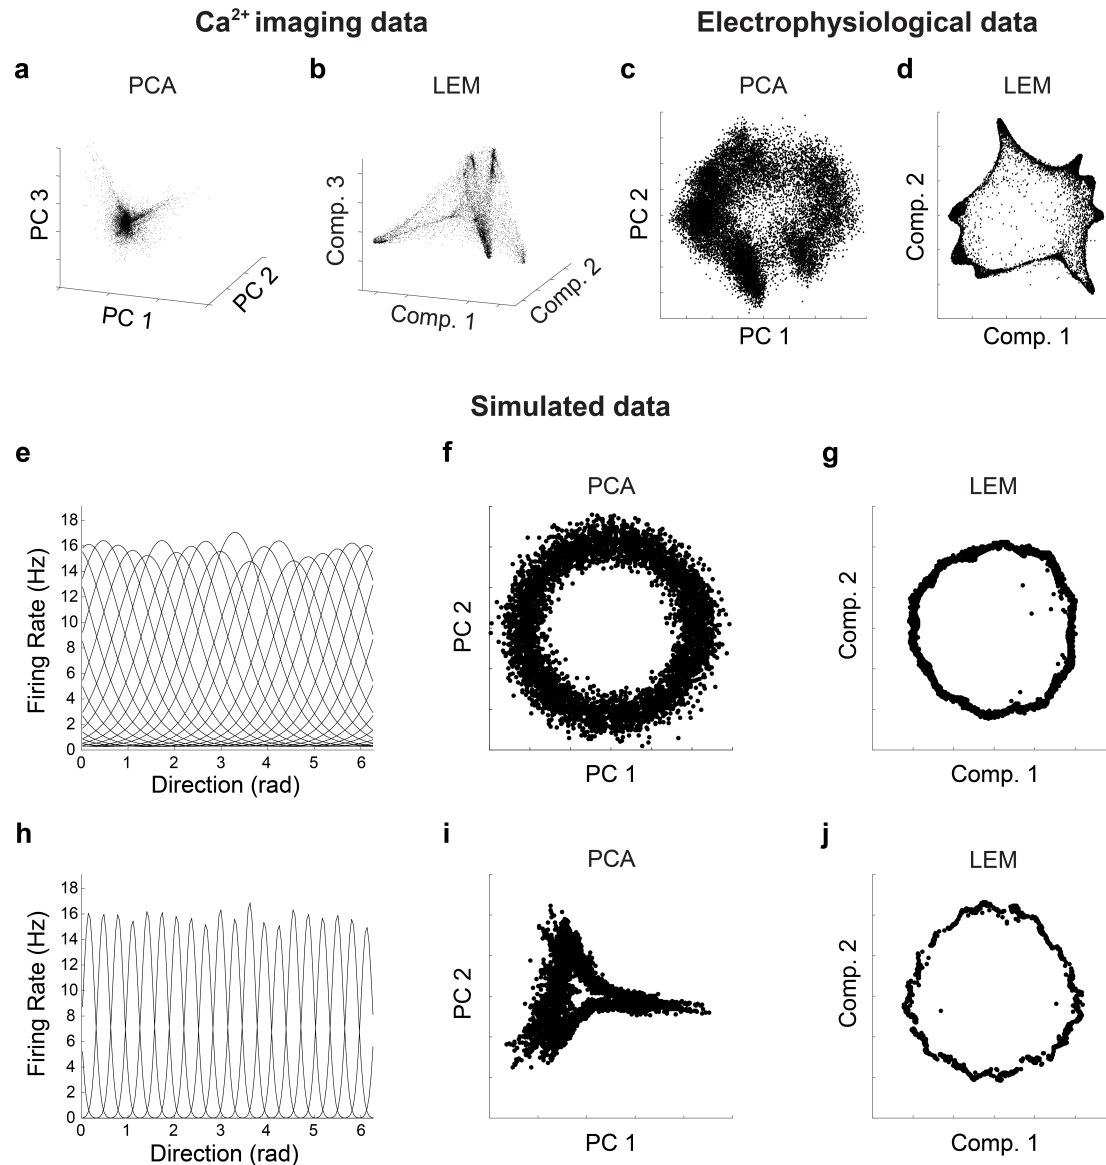

1 **Supplementary Fig. 1: Non-linear dimensionality reduction enables more accurate**  
2 **estimation of internal structure than linear methods. (a-b)  $\text{Ca}^{2+}$  imaging data:** the distribution of  
3 data points in the reduced dimensional space of neuronal activity, using PCA and (a) and LEM (b).  
4 (c-d) Electrophysiological data: the distribution of data points in the reduced dimensional space of  
5 neuronal activity, using PCA and (c) and LEM (d). (e and h) We simulated neuronal responses for  
6 20 conditionally independent neurons which follow Poisson statistics. The centers of the tuning  
7 curves were equally spaced on a one-dimensional circular variable, and were either widely tuned  
8 (e) or narrowly tuned (h). (f-g) The distribution of data points in the reduced space of neuronal  
9 activity, using PCA (f), and LEM (g), for widely tuned neurons. Both methods captured the ring  
10 topology of the data. (i-j) The distribution of data points in the reduced space of neuronal activity,  
11 using PCA (i), and LEM (j), for narrowly tuned neurons. LEM exposed the ring topology more  
12 successfully compared to PCA.

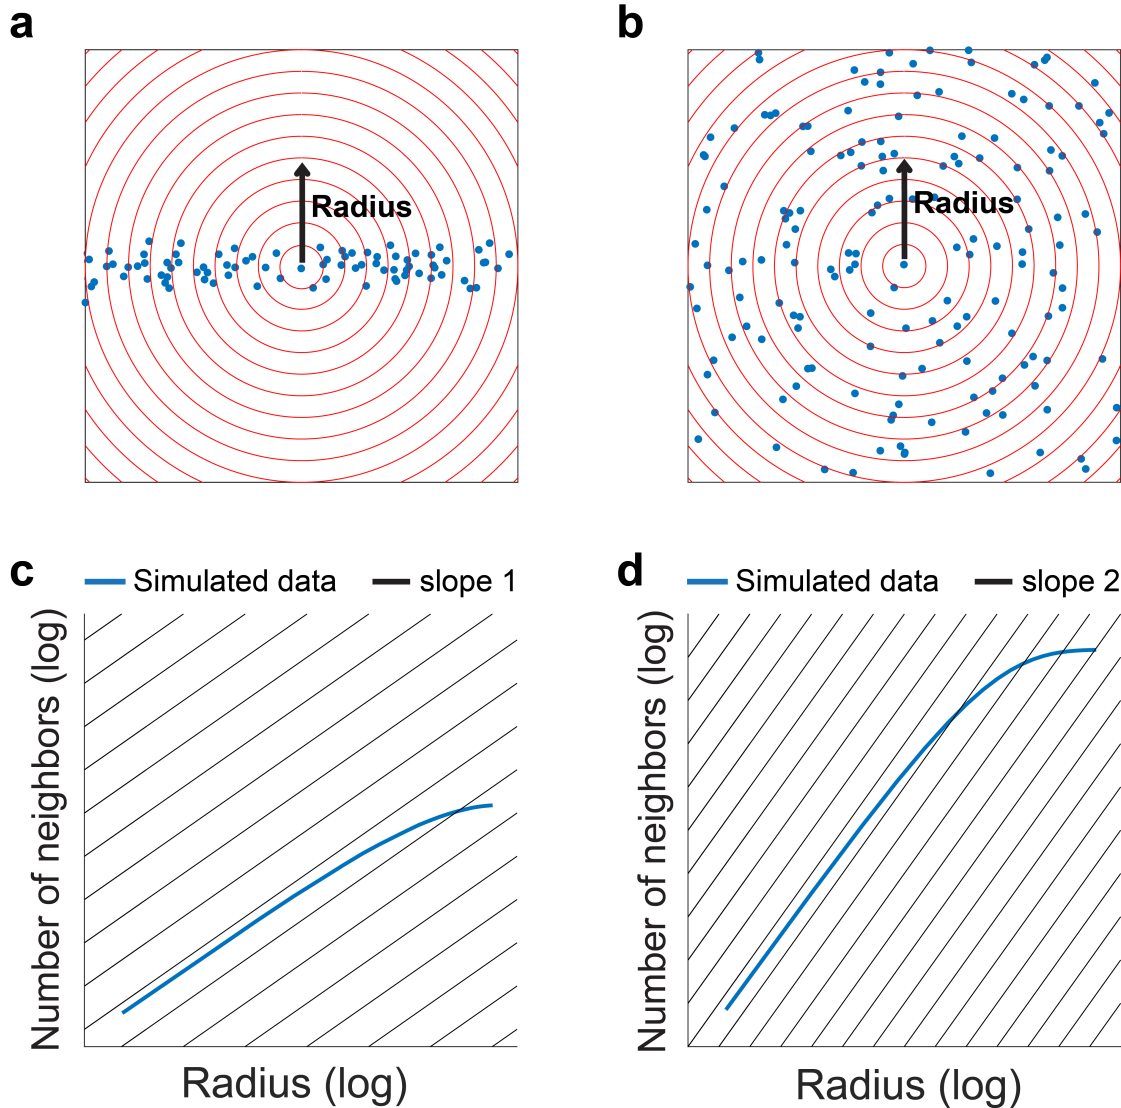

1 **Supplementary Fig. 2: Estimation of the internal dimension of the data.** (a-b) Simulated data  
2 points, for 1-dimensional data (a) and for 2-dimensional data (b). The red circles indicate different  
3 distances (radii) from a given data point. (c-d) The average number of neighboring data points  
4 increases with the radius obeying a power law. The power is indicative of the internal dimension of  
5 the data. The number of neighboring data points increases linearly (c) or quadratically (d) with the  
6 radius, for 1-dimensional and 2-dimensional data, respectively.

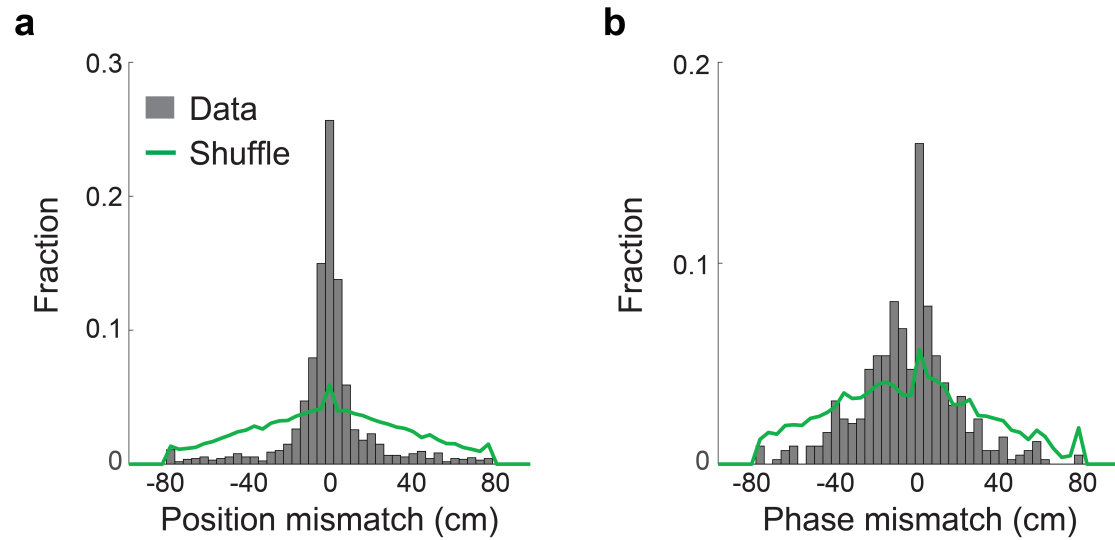

1 **Supplementary Fig. 3: Internal tuning curves of the hippocampal CA1 and ACC reveal**  
2 **similar coding properties to those of their corresponding external tuning curves. (a-b)** The  
3 distribution of differences in the preferred position (a) and preferred phase (b) between the  
4 calculated internal and external tuning curves of the same neurons, for data recorded from the  
5 hippocampal CA1 (a) and from the ACC (b). Data are represented in gray, and shuffled data in  
6 green. Data in a pooled from N=4 mice, and in b from N=3 mice.



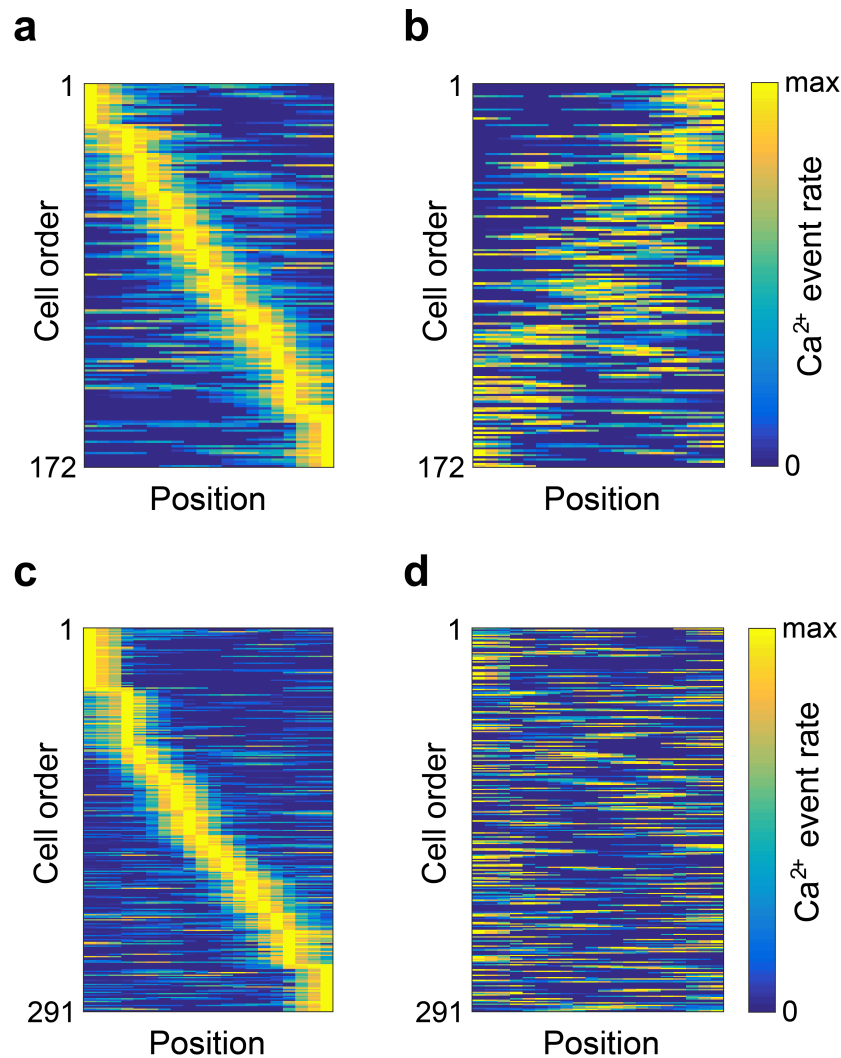

1 **Supplementary Fig. 4: Neurons in the ACC, but not in the CA1, encode the trajectory phase**  
2 **for mice running on a linear track.** For each neuron, we calculated its event rate as a function of  
3 the animal's position (spatial tuning curves) when running in a given direction. (a) Spatial tuning  
4 curves for ACC neurons ordered according to their preferred position along the track. (b) Spatial  
5 tuning curves for the same neurons with the same order as in a, calculated for the opposite  
6 running direction. (c) Spatial tuning curves for hippocampal neurons, ordered according to their  
7 preferred position along the track. (d) Spatial tuning curves for the same neurons with the same  
8 order as in c, calculated for the opposite running direction. Note that while in the hippocampus  
9 there is no clear relationship between the preferred positions of the same neurons in the two  
10 different running directions, the neurons in the ACC tend to have a symmetrical preferred position  
11 for the two directions, hence coding the trajectory phase.

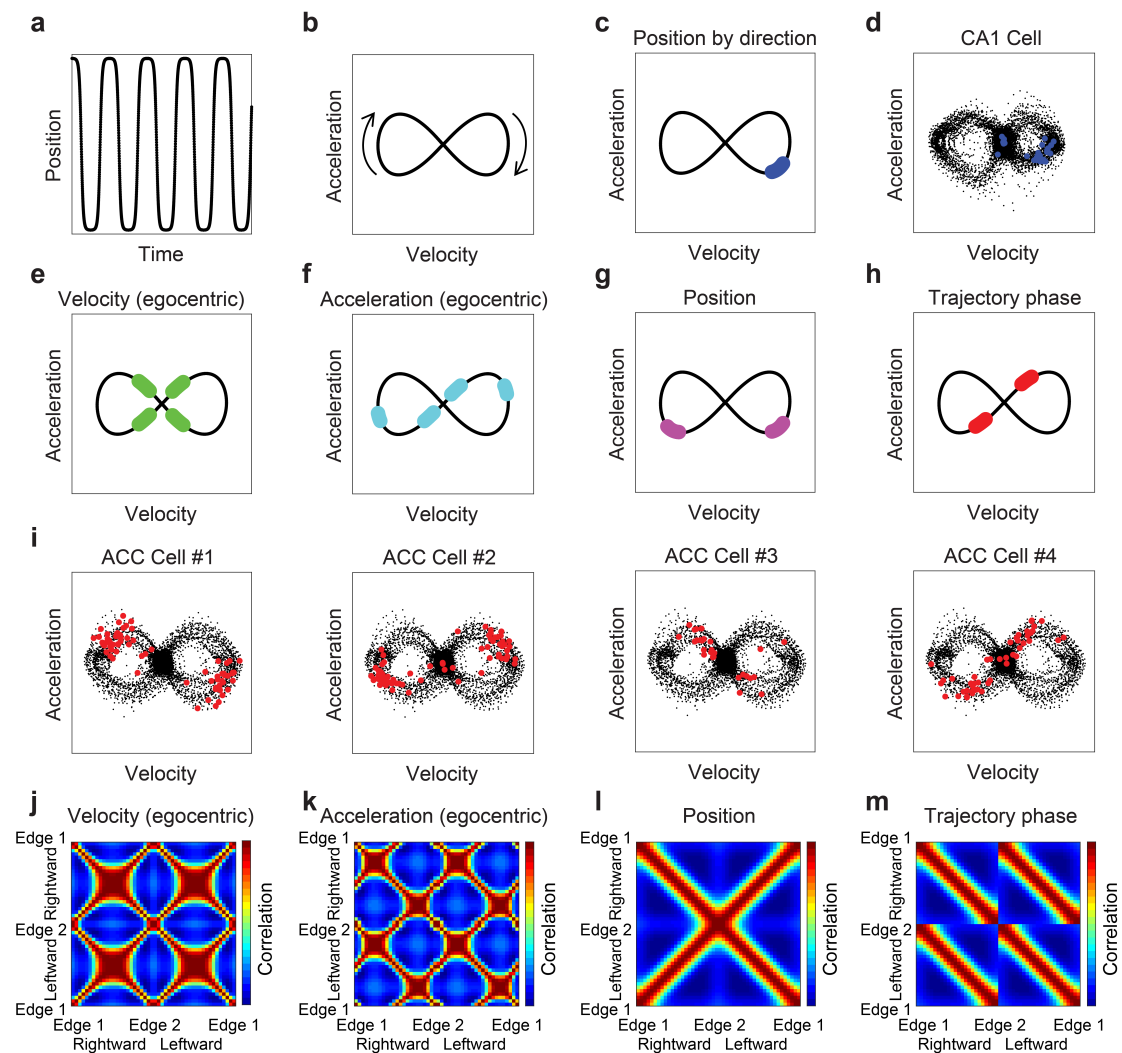

1 **Supplementary Fig. 5: The encoding of trajectory phase in the ACC could not be accounted**  
2 **for by velocity or acceleration.** (a) A simulated trajectory along a linear track. (b) The  
3 acceleration versus the velocity for the trajectory in a. (c) The activity of a simulated place cell  
4 (blue dots) which is responsive at a particular location in one running direction, overlaid on the  
5 velocity-acceleration plot in b. (d) The activity of an example place cell from the hippocampal data  
6 (black dots), overlaid on the velocity-acceleration of the mouse (black dots). (e-h) The activity of a  
7 simulated cell overlaid on velocity-acceleration plot, for a cell that is responsive to a given speed  
8 (e), acceleration (f), position (g), or trajectory phase (h). (i) The activity of four example cells from  
9 the ACC data (red dots), overlaid on the velocity-acceleration of the mouse (black dots). The  
10 activity matches the simulated trajectory phase cells. (j-m) Pearson correlation between simulated  
11 ensemble activity patterns from different spatial locations on the linear track, for cells that are  
12 encoding speed (j), acceleration (k), position (l), or trajectory phase (m). The ensemble activity (as  
13 shown in Fig. 2m) matches the simulated trajectory phase ensemble.

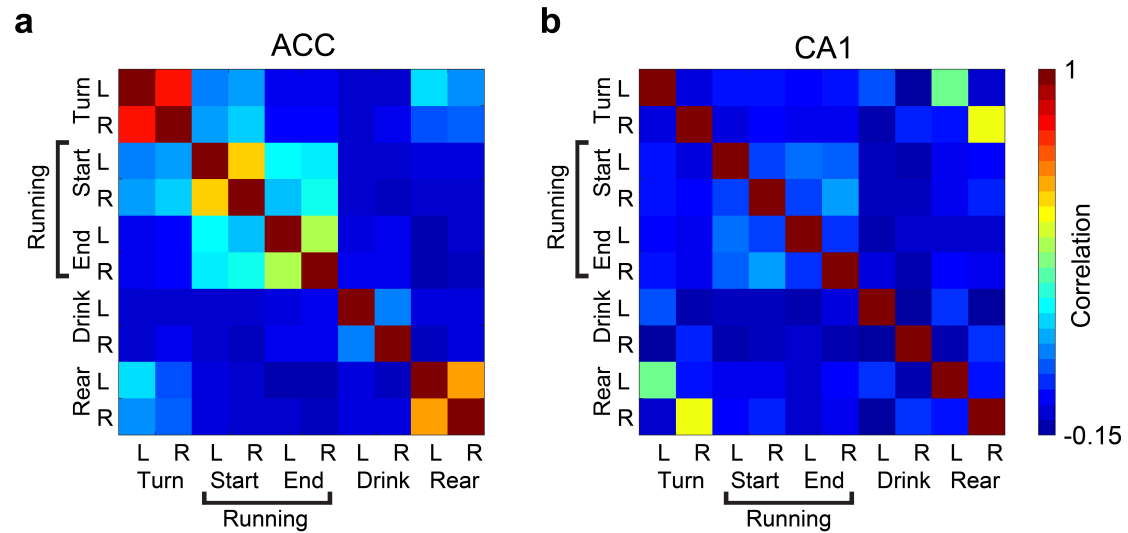

1 **Supplementary Fig. 6: Neuronal activity during epochs of a given behavioral state are**  
2 **similar across opposite sides of the track, for data recorded from the ACC, but not from the**  
3 **hippocampus. (a-b) Pearson correlation between ensemble activity patterns given the behavioral**  
4 **state and side of the linear track, for the ACC (a) and hippocampal CA1 (b). Ensemble activity**  
5 **patterns are defined as the mean event rate for each neuron given a behavioral state on the same**  
6 **side of the track or the same running direction. L – left side or leftward epochs, R – right side or**  
7 **rightward epochs. Data averaged over N=3 mice in the ACC, and N=4 mice in the hippocampus.**

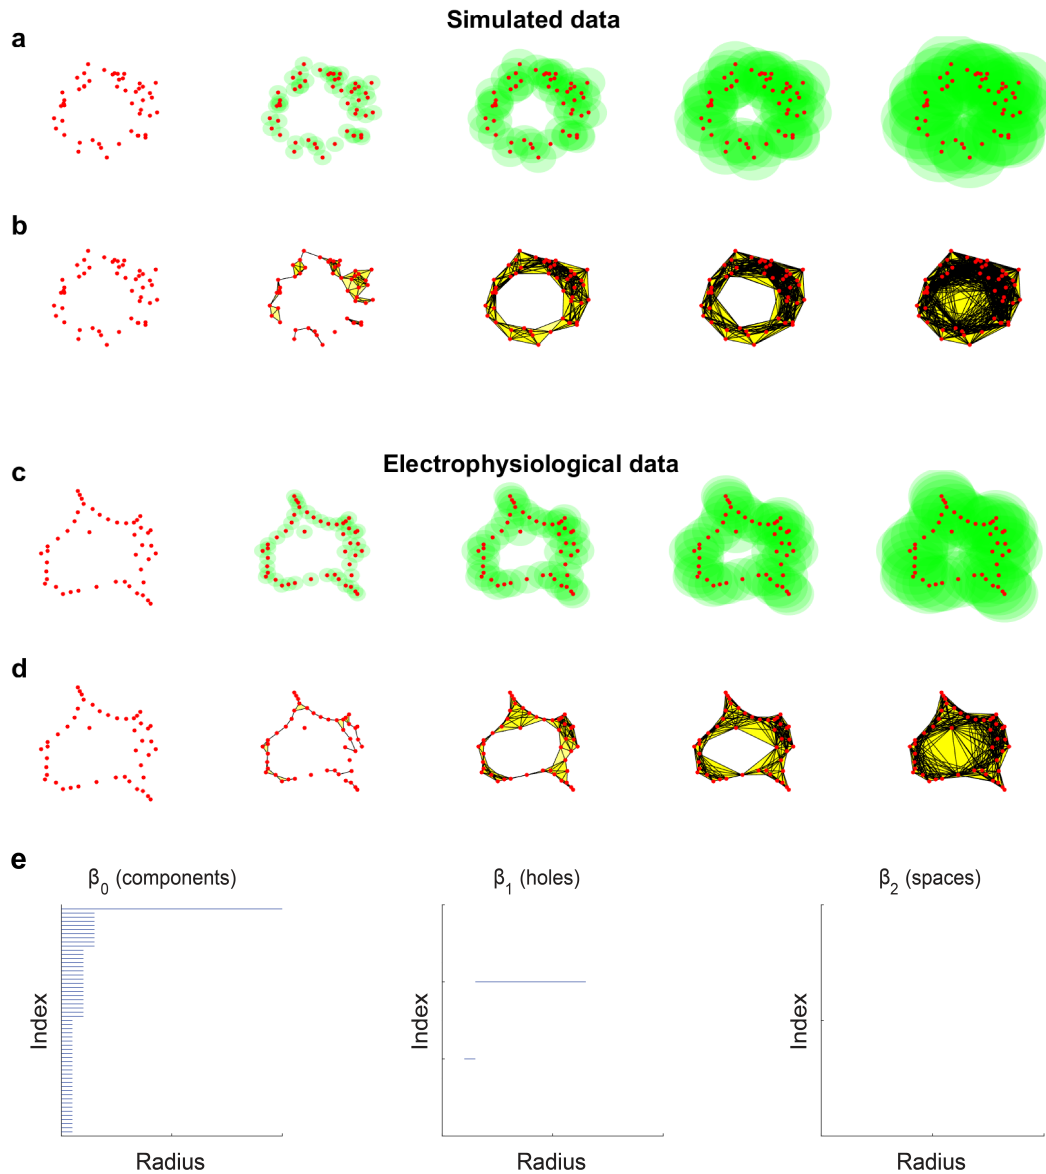

1 **Supplementary Fig. 7: Measuring the internal topology of the data based on the estimation**  
 2 **of the numbers of components, holes, and spaces. (a-b)** Simulated data with a ring topology.  
 3 **(a)** Simulated data points (red dots) and an increasing radius (from left to right) represented by  
 4 filled green circles around each data point. **(b)** The connections (black lines) between data points  
 5 with overlapping surrounding spheres for different radii of the sphere (increasing from left to right).  
 6 Triplets (cliques of three data points that are all interconnected) are marked by yellow areas. **(c-d)**  
 7 Head direction data. **(c)** Representative data points (centers of mass of clustered data, red dots)  
 8 and an increasing radius (from left to right) represented by filled green circles around each data  
 9 point. **(d)** The connections (black lines) between data points with overlapping surrounding spheres  
 10 for different radii of the sphere (increasing from left to right). Triplets (cliques of three data points  
 11 that are all interconnected) are marked by yellow areas. **(e)** Quantifying the internal topology of the  
 12 electrophysiological data by estimating the number of separate components ( $\beta_0$ ), number of holes  
 13 ( $\beta_1$ ), and number of spaces ( $\beta_2$ ). We observed one component, one hole, and zero spaces for a  
 14 wide range of radii, as expected for a ring topology.

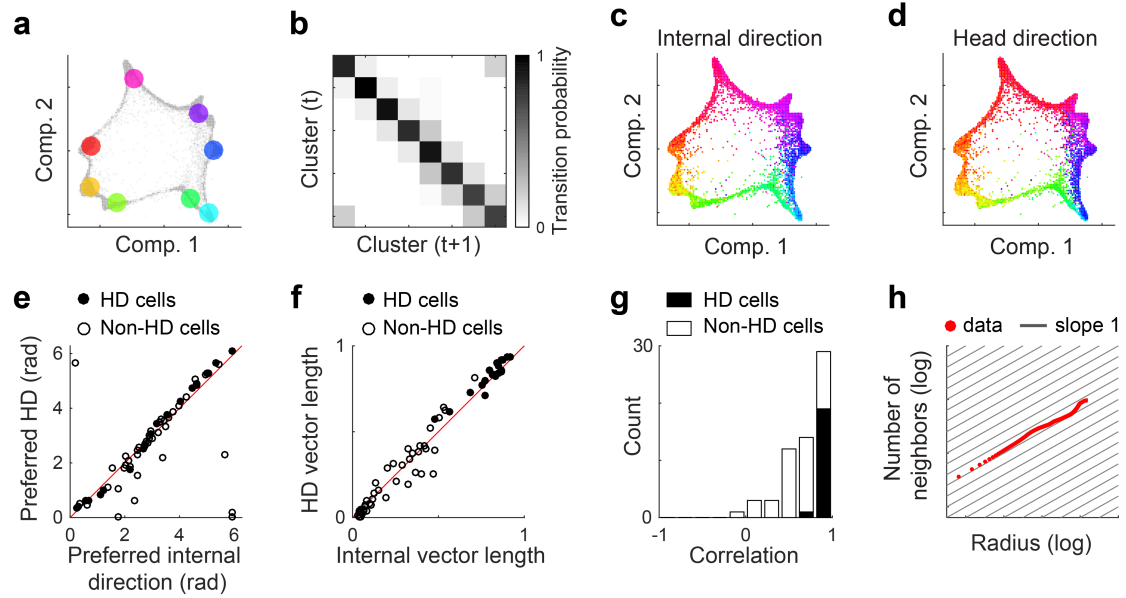

1 **Supplementary Fig. 8: Internal representation of head direction obtained without relying on**  
2 **behavioral data.** (a) Clustering of the data in Fig. 4b. The centers of masses of each cluster  
3 (colored dots) are overlaid on the data points in Fig. 4b (gray shaded dots). (b) The transition  
4 matrix (i.e., the probability of a data point appearing in cluster  $i$ , given that the preceding data point  
5 was in cluster  $j$ ) shows that consecutive data points are more likely to be in the same or adjacent  
6 clusters. (c-d) The distribution of data points in the reduced dimensional space of neuronal activity,  
7 color coded according to the reconstructed internal direction (c), and the actual head direction (d).  
8 (e-f) The preferred direction (e), and Rayleigh vector length (f) calculated for the internal tuning  
9 curves (x-axis) and for the external tuning curves (y-axis). Filled circles indicate cells significantly  
10 tuned to head direction. (g) Distribution of correlations between internal and external tuning  
11 curves. Cells significantly tuned to head direction are shown in black. (h) Estimation of internal  
12 dimension: Cumulative number of neighboring data points as a function of the radius in the  
13 reduced dimensionality space, plotted on a log-log scale. The slope of the data (red) is  
14 approximately one (black lines), indicating one-dimensional data.

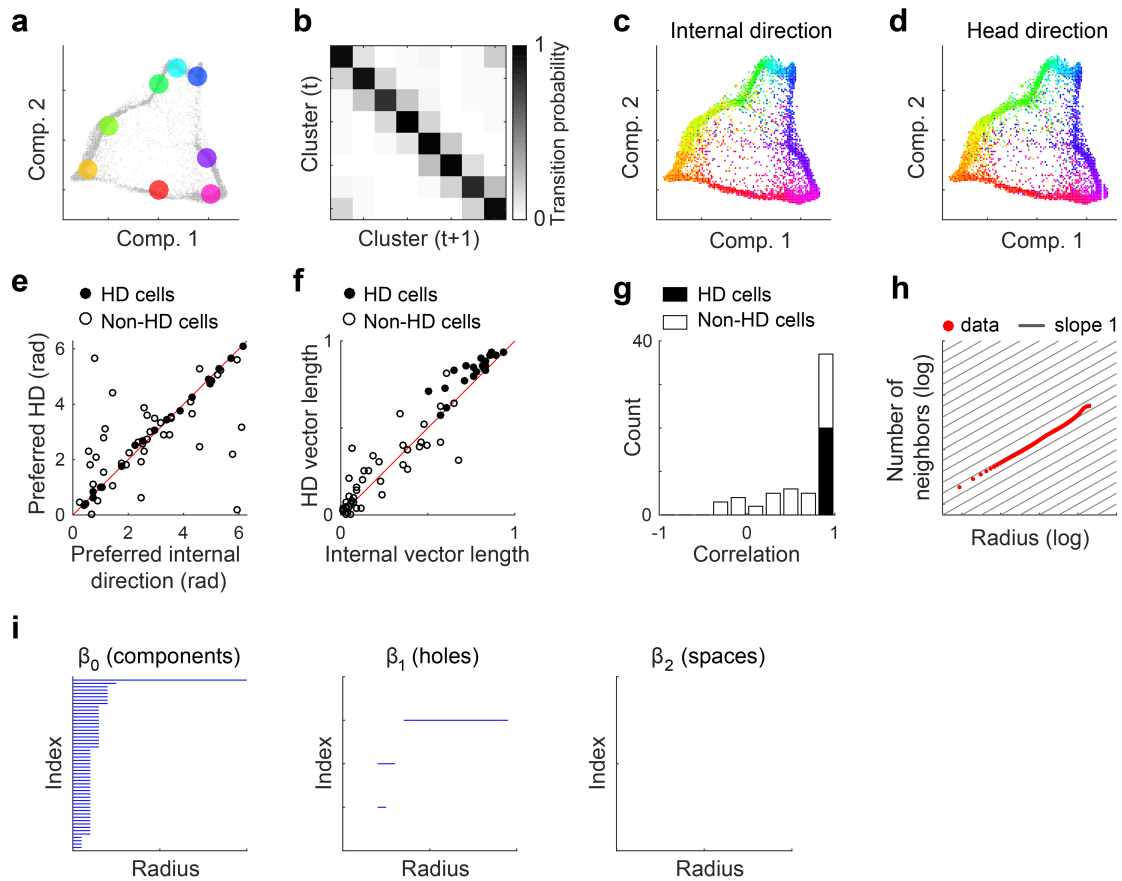

1 **Supplementary Fig. 9: Internal representation of head direction during REM sleep.** (a)  
2 Clustering of the data in Fig. 4C. The centers of mass of the clusters (colored dots) are overlaid on  
3 the data points in Fig. 4C (shaded gray). (b) The transition matrix (i.e., the probability of a data  
4 point to be in cluster  $i$  given that the preceding data points was in cluster  $j$ ) shows that consecutive  
5 data points are more likely to be in the same or adjacent clusters. (c-d) The distribution of data  
6 points in the reduced dimensional space of neuronal activity color coded according to the  
7 reconstructed internal direction (c) and to the estimated head direction (d). (e-f) The preferred  
8 direction (e) and Rayleigh vector length (f) calculated for the internal tuning curves during REM  
9 sleep (x-axis) and for the external tuning curves during wake periods (y-axis). Filled circles indicate  
10 significantly tuned head direction cells. (g) Distribution of correlation between internal (during  
11 REM) and external (during wake) tuning curves. Significantly tuned head direction cells are shown  
12 in black. (h) Estimation of internal dimension: Cumulative number of neighboring data points as a  
13 function of the radius in the reduced dimensionality space, plotted on a log-log scale. The slope of  
14 the data (red) is approximately one (black), indicating one-dimensional data. (i) Measuring the  
15 internal topology of the data based on the estimation of the numbers of components ( $\beta_0$ ), holes  
16 ( $\beta_1$ ), and spaces ( $\beta_2$ ). Even during REM sleep we obtain one component, one hole, and zero  
17 spaces, for a wide range of radii. Overall these results indicate that the relationships between the  
18 neuronal activity patterns are preserved even in the absence of sensory input, reflecting inherent  
19 computational properties of these circuits.

1 **Supplementary Movie Legends**

2  
3 **Supplementary Movie 1: Neuronal activity in the hippocampal CA1 reveals a high density**  
4 **of data points within a small number of clusters.** The distribution of data points in the  
5 reduced dimensional space of neuronal activity from different view angles is shown.

6  
7 **Supplementary Movie 2: Different states of neuronal activity in the hippocampal CA1**  
8 **correspond to different behavioral states depending on their side of the linear track.**  
9 Concatenated epochs of mouse behavior, which correspond to a given neuronal activity  
10 state are shown, and the neuronal activity state and index of the epoch are specified.

11  
12 **Supplementary Movie 3: Different states of neuronal activity in the ACC correspond to**  
13 **different behavioral states regardless of the side of the linear track.** Concatenated  
14 epochs of mouse behavior correspond to a given neuronal activity state. The neuronal  
15 activity state and index of the epoch are specified.

16  
17 **Supplementary Movie 4: Neuronal activity in the ADn and PoS forms a ring topology in a**  
18 **reduced dimensional space, with a non-periodic continuous trajectory.** Top left: the  
19 trajectory of neuronal activity (moving dot) overlaid on the distribution of data points in the  
20 reduced dimensional space of neuronal activity. Bottom right: the actual head direction of  
21 the mouse, represented by the angle of the clock hand. Data points colored according to  
22 head direction.

23  
24 **Supplementary Movie 5: Neuronal activity in the ADn and PoS forms a ring topology in a**  
25 **reduced dimensional space during periods of REM sleep.** The trajectory of neuronal  
26 activity (moving dot) overlaid on the distribution of data points in the reduced dimensional  
27 space of neuronal activity. The internal structure and the trajectory within it are maintained  
28 during REM sleep, when the head direction is mostly constant. Color represents the head  
29 direction as reconstructed by a maximum likelihood decoder that was trained on data from  
30 wake periods.

31  
32 **Supplementary Movie 6: Across-mice decoder infers the behavioral state and position of**  
33 **the animal, based on the mapping between the behavior and activity patterns in the**  
34 **hippocampus of another animal.** Top left: The trajectory of neuronal activity (moving dot)  
35 for mouse 1 overlaid on the distribution of data points in the dimensionality reduced space  
36 of neuronal activity in mouse 1 (first two components). Top left: the corresponding  
37 trajectory of neuronal activity (moving dot) for mouse 1 overlaid on the distribution of data  
38 points in the dimensionality reduced space of neuronal activity in mouse 2 (first two  
39 components). Bottom left: Behavioral data from mouse 1. Bottom right: Reconstructed  
40 behavioral data of mouse 1 based on the mapping between the behavior and activity  
41 patterns.
